# Supplementary material for: Landform and lithospheric development contribute to the assembly of mountain floras in China
Source: PubMed Central journal article supplement (PMC11183111; doi:10.1038/s41467-024-49522-4), 2024-06-17
Supplement: 41467_2024_49522_MOESM1_ESM.pdf [file 41467_2024_49522_MOESM1_ESM.pdf]

## Supplementary Information:

**Supplementary Table 1** The checklists of 140 mountain floras used in this study.

| Num. | Province  | Mountain flora               | Acronym  | Tectonic type | Landform type | Area (km <sup>2</sup> ) | Longitude (E) | Latitude (N) |
|------|-----------|------------------------------|----------|---------------|---------------|-------------------------|---------------|--------------|
| 1    | Jiangxi   | Xiaowudang <sup>1</sup>      | jxxwd    | orogenic      | Danxia        | 13.5                    | 114.721660    | 24.612923    |
| 2    | Guangdong | Danxiashan <sup>2</sup>      | gddxs    | orogenic      | Danxia        | 292.0                   | 113.738866    | 25.015979    |
| 3    | Guangdong | Nanxiongdanxia <sup>3</sup>  | gdnxdx   | orogenic      | Danxia        | 23.6                    | 114.196079    | 25.140916    |
| 4    | Jiangxi   | Hanxianyan <sup>1</sup>      | jxhxy    | orogenic      | Danxia        | 75.0                    | 115.808300    | 25.200044    |
| 5    | Jiangxi   | Luohanyan <sup>1</sup>       | jxlhy    | orogenic      | Danxia        | 10.0                    | 116.168703    | 25.999337    |
| 6    | Hunan     | Langshang <sup>4</sup>       | hnlngs   | craton        | Danxia        | 108.0                   | 110.806533    | 26.396407    |
| 7    | Fujian    | Tainingdanxia <sup>5</sup>   | ftndx    | orogenic      | Danxia        | 234.9                   | 117.074066    | 26.890974    |
| 8    | Jiangxi   | Longhushan <sup>1</sup>      | jxlhs    | orogenic      | Danxia        | 220.0                   | 116.975421    | 28.095946    |
| 9    | Sichuan   | Huagaoxi <sup>6</sup>        | schgx    | craton        | Danxia        | 238.3                   | 105.537794    | 28.275538    |
| 10   | Jiangxi   | Guifeng <sup>1</sup>         | jxgf     | orogenic      | Danxia        | 136.0                   | 117.372524    | 28.320805    |
| 11   | Qinghai   | Sjiangyuan <sup>7</sup>      | qhsjy    | craton        | Desert        | 395000.0                | 97.261475     | 33.024621    |
| 12   | Qinghai   | Huangheyuan <sup>8</sup>     | qhhy     | orogenic      | Desert        | 436.0                   | 97.424011     | 34.794634    |
| 13   | Xinjiang  | Xikunlunshan <sup>9</sup>    | xjxkls   | orogenic      | Desert        | 300000.0                | 79.538962     | 36.165253    |
| 14   | Gansu     | Qilianshan <sup>10</sup>     | gsqsls   | orogenic      | Desert        | 2062.0                  | 101.610756    | 37.640065    |
| 15   | Neimenggu | Helanshan <sup>11</sup>      | nmghls   | craton        | Desert        | 885.0                   | 105.964396    | 38.873439    |
| 16   | Xinjiang  | Luobupo <sup>12</sup>        | xjlbp    | craton        | Desert        | 78000.0                 | 89.954063     | 39.588288    |
| 17   | Neimenggu | Qilaotushan <sup>13</sup>    | nmqqlts  | craton        | Desert        | 11000.0                 | 117.795695    | 42.615351    |
| 18   | Xinjiang  | Xitianshan <sup>14</sup>     | xjxts    | orogenic      | Desert        | 27700.0                 | 85.163193     | 43.674311    |
| 19   | Xinjiang  | Dongtianshan <sup>15</sup>   | xjdts    | orogenic      | Desert        | 26500.0                 | 88.456227     | 43.828050    |
| 20   | Neimenggu | Alukeerqin <sup>16</sup>     | nmgalkeq | orogenic      | Desert        | 1367.9                  | 119.931700    | 43.895877    |
| 21   | Xinjiang  | Bozhounanbu <sup>17</sup>    | xjblnb   | orogenic      | Desert        | 5093.3                  | 84.298096     | 44.107310    |
| 22   | Neimenggu | Saihanwula <sup>18</sup>     | nmgshwl  | orogenic      | Desert        | 1004.0                  | 118.647924    | 44.251478    |
| 23   | Xinjiang  | Kelamayi <sup>19</sup>       | xjklmy   | orogenic      | Desert        | 9500.0                  | 84.789884     | 45.578491    |
| 24   | Hainan    | Houmiling <sup>20</sup>      | hnhml    | orogenic      | Karst_Gr      | 122.2                   | 109.091148    | 18.913107    |
| 25   | Guangxi   | Cenwanglaoshan <sup>21</sup> | gxcwls   | craton        | Karst_Gr      | 189.9                   | 106.404344    | 24.499899    |
| 26   | Guangxi   | Yachang <sup>22</sup>        | gxy      | craton        | Karst_Gr      | 220.6                   | 106.338511    | 24.782709    |
| 27   | Guizhou   | Nayong <sup>23</sup>         | gzny     | craton        | Karst_Gr      | 114.0                   | 105.341967    | 26.762852    |
| 28   | Guizhou   | Zhujiashan <sup>24</sup>     | gzjjs    | craton        | Karst_Gr      | 76.4                    | 107.639239    | 26.983206    |
| 29   | Yunnan    | Yaoshan <sup>25</sup>        | ynys     | craton        | Karst_Gr      | 201.4                   | 103.044380    | 27.237795    |
| 30   | Guizhou   | Fodingshan <sup>26</sup>     | gzfds    | craton        | Karst_Gr      | 152.0                   | 108.108273    | 27.337433    |
| 31   | Yunnan    | Zhaotongbeibu <sup>27</sup>  | ynztbb   | craton        | Karst_Gr      | 450.0                   | 103.877887    | 27.631134    |
| 32   | Guizhou   | Yinjiangyangxi <sup>28</sup> | gzyjyx   | craton        | Karst_Gr      | 218.7                   | 108.513666    | 27.691466    |
| 33   | Hunan     | Wulingyuan <sup>29</sup>     | hwlly    | craton        | Karst_Gr      | 369.0                   | 110.431569    | 29.380863    |
| 34   | Sichuan   | Emeishan <sup>30</sup>       | scems    | craton        | Karst_Gr      | 154.0                   | 103.327029    | 29.519983    |
| 35   | Hubei     | Houhe <sup>31</sup>          | hbhh     | craton        | Karst_Gr      | 103.4                   | 110.559540    | 30.078601    |
| 36   | Hubei     | Shennongjia <sup>32</sup>    | hbsnj    | craton        | Karst_Gr      | 12837.0                 | 110.279186    | 31.490496    |
| 37   | Shanxi    | Wulushan <sup>33</sup>       | sxwls    | craton        | Granitic      | 206.2                   | 111.189177    | 36.581741    |
| 38   | Hainan    | Diaoluoshan <sup>34</sup>    | hdlsls   | orogenic      | Granitic      | 183.9                   | 109.863383    | 18.747009    |
| 39   | Hainan    | Jianfengling <sup>35</sup>   | hnjfl    | orogenic      | Granitic      | 200.0                   | 108.881158    | 18.755486    |
| 40   | Hainan    | Wuzhishan <sup>36</sup>      | hnwzs    | orogenic      | Granitic      | 80.0                    | 109.706696    | 18.913251    |

| Num. | Province  | Mountain flora              | Acronym | Tectonic type | Landform type | Area (km <sup>2</sup> ) | Longitude (E) | Latitude (N) |
|------|-----------|-----------------------------|---------|---------------|---------------|-------------------------|---------------|--------------|
| 41   | Hainan    | Yinggeling <sup>37</sup>    | hnygl   | orogenic      | Granitic      | 504.6                   | 109.525487    | 19.045745    |
| 42   | Hainan    | Bawangling <sup>38</sup>    | hnbwl   | orogenic      | Granitic      | 299.8                   | 109.196929    | 19.087155    |
| 43   | Guangxi   | Shiwandashan <sup>39</sup>  | gxswds  | orogenic      | Granitic      | 616.9                   | 107.957454    | 21.893650    |
| 44   | Guangdong | Ehuangzhang <sup>40</sup>   | gdehz   | orogenic      | Granitic      | 144.5                   | 111.457604    | 21.893709    |
| 45   | Guangdong | Yunkaishan <sup>41</sup>    | gdyks   | orogenic      | Granitic      | 125.1                   | 111.198090    | 22.275547    |
| 46   | Guangdong | Dinghushan <sup>42</sup>    | gddhs   | orogenic      | Granitic      | 11.6                    | 112.515233    | 23.182765    |
| 47   | Guangdong | Xiangtoushan <sup>43</sup>  | gdxts   | orogenic      | Granitic      | 107.0                   | 114.395985    | 23.306850    |
| 48   | Guangdong | Heishiding <sup>44</sup>    | gdhsd   | orogenic      | Granitic      | 42.0                    | 111.869393    | 23.463809    |
| 49   | Guangxi   | Damingshan <sup>45</sup>    | gxdms   | craton        | Granitic      | 169.9                   | 108.432321    | 23.478308    |
| 50   | Taiwan    | Taiwanshanmai <sup>46</sup> | twsm    | orogenic      | Granitic      | 36000.0                 | 121.113281    | 23.563987    |
| 51   | Yunnan    | Yuanjiang <sup>47</sup>     | ynyj    | craton        | Granitic      | 466.7                   | 101.955931    | 23.617135    |
| 52   | Guangdong | Nankunshan <sup>48</sup>    | gdnks   | orogenic      | Granitic      | 18.9                    | 113.840087    | 23.632136    |
| 53   | Yunnan    | Lancangjiang <sup>49</sup>  | ynlcj   | craton        | Granitic      | 751.9                   | 99.162598     | 23.995035    |
| 54   | Yunnan    | Yizushan <sup>50</sup>      | ynyzs   | craton        | Granitic      | 1107.2                  | 101.675149    | 23.999811    |
| 55   | Guangxi   | Daguishan <sup>51</sup>     | gxdgs   | orogenic      | Granitic      | 37.8                    | 111.718467    | 24.156766    |
| 56   | Guangxi   | Dayaoshan <sup>52</sup>     | gxdys   | orogenic      | Granitic      | 256.0                   | 110.246070    | 24.182143    |
| 57   | Guangdong | Shimentai <sup>53</sup>     | gdsmt   | orogenic      | Granitic      | 335.6                   | 113.304768    | 24.434960    |
| 58   | Jiangxi   | Jiulianshan <sup>54</sup>   | jxjlans | orogenic      | Granitic      | 134.1                   | 114.540122    | 24.662487    |
| 59   | Guangxi   | Xilingshan <sup>55</sup>    | gxxls   | orogenic      | Granitic      | 193.3                   | 111.214892    | 24.765648    |
| 60   | Guangdong | Nanling <sup>56</sup>       | gdnl    | orogenic      | Granitic      | 587.0                   | 112.939453    | 24.839088    |
| 61   | Hunan     | Lanshan <sup>57</sup>       | hnlans  | orogenic      | Granitic      | 70.5                    | 112.011795    | 25.070673    |
| 62   | Guangxi   | Jiuwanshan <sup>58</sup>    | gxjws   | craton        | Granitic      | 252.1                   | 108.755739    | 25.182968    |
| 63   | Fujian    | Liangyeshan <sup>59</sup>   | fjllys  | orogenic      | Granitic      | 143.7                   | 116.127130    | 25.184593    |
| 64   | Guangxi   | Sanpihu <sup>60</sup>       | gxspth  | craton        | Granitic      | 31.1                    | 107.167474    | 25.320134    |
| 65   | Guangxi   | Yuanbaoshan <sup>61</sup>   | gxybs   | craton        | Granitic      | 146.7                   | 109.167022    | 25.397376    |
| 66   | Hunan     | Dupangling <sup>62</sup>    | hdnpl   | craton        | Granitic      | 200.7                   | 111.317758    | 25.462202    |
| 67   | Hunan     | Daguping <sup>63</sup>      | hdnpg   | craton        | Granitic      | 134.7                   | 111.617952    | 25.729162    |
| 68   | Jiangxi   | Qiyunshan <sup>64</sup>     | jxqys   | orogenic      | Granitic      | 171.1                   | 114.005382    | 25.890078    |
| 69   | Hunan     | Bamianshan <sup>65</sup>    | hnbms   | orogenic      | Granitic      | 109.7                   | 113.654435    | 25.926073    |
| 70   | Guizhou   | Yueliangshan <sup>66</sup>  | gzyls   | craton        | Granitic      | 345.6                   | 108.274069    | 25.944528    |
| 71   | Jiangxi   | Ganjiangyuan <sup>67</sup>  | jxgjy   | orogenic      | Granitic      | 161.0                   | 116.370548    | 26.042802    |
| 72   | Hunan     | Jintongshan <sup>68</sup>   | hnjts   | craton        | Granitic      | 184.7                   | 110.204369    | 26.156223    |
| 73   | Guangxi   | Yinzhulaoshan <sup>69</sup> | gxyzls  | craton        | Granitic      | 54.7                    | 110.578151    | 26.281733    |
| 74   | Jiangxi   | Nanfegnian <sup>70</sup>    | jxnfm   | orogenic      | Granitic      | 105.9                   | 114.039910    | 26.313425    |
| 75   | Fujian    | Junzifeng <sup>71</sup>     | fjjzf   | orogenic      | Granitic      | 138.5                   | 117.208096    | 26.337936    |
| 76   | Guizhou   | Leigongshan <sup>72</sup>   | gzlgs   | craton        | Granitic      | 477.9                   | 108.216687    | 26.382360    |
| 77   | Hunan     | Shunhuangshan <sup>73</sup> | hnsbs   | craton        | Granitic      | 131.4                   | 111.043147    | 26.401115    |
| 78   | Hunan     | Taoyuandong <sup>74</sup>   | hntyd   | orogenic      | Granitic      | 237.9                   | 114.010819    | 26.459181    |
| 79   | Guizhou   | Nangong <sup>75</sup>       | gzng    | craton        | Granitic      | 221.0                   | 108.295864    | 26.615687    |
| 80   | Jiangxi   | Jinggangshan <sup>76</sup>  | jxjgs   | orogenic      | Granitic      | 708.7                   | 114.146053    | 26.637238    |
| 81   | Jiangxi   | Qixiling <sup>77</sup>      | jxqxl   | orogenic      | Granitic      | 105.0                   | 114.195618    | 26.754804    |
| 82   | Fujian    | Minjiangyuan <sup>78</sup>  | fjmjy   | orogenic      | Granitic      | 130.2                   | 116.893291    | 26.776772    |

| Num. | Province  | Mountain flora                    | Acronym  | Tectonic type | Landform type | Area (km <sup>2</sup> ) | Longitude (E) | Latitude (N) |
|------|-----------|-----------------------------------|----------|---------------|---------------|-------------------------|---------------|--------------|
| 83   | Fujian    | Longqishan <sup>79</sup>          | fjlqs    | orogenic      | Granitic      | 156.9                   | 117.506037    | 26.883812    |
| 84   | Fujian    | Donggongshanbeiduan <sup>80</sup> | fjdgdsbd | orogenic      | Granitic      | 10500.0                 | 119.137078    | 27.112386    |
| 85   | Jiangxi   | Gaotianyan <sup>81</sup>          | jxgty    | orogenic      | Granitic      | 47.8                    | 114.016113    | 27.373901    |
| 86   | Jiangxi   | Wugongshan <sup>82</sup>          | jxwgs    | orogenic      | Granitic      | 170.0                   | 114.172842    | 27.463325    |
| 87   | Jiangxi   | Dagangshan <sup>83</sup>          | jxdgs    | orogenic      | Granitic      | 12.0                    | 114.530271    | 27.604151    |
| 88   | Yunnan    | Dulongjiangliuyu <sup>84</sup>    | yndljly  | orogenic      | Granitic      | 1947.0                  | 98.349127     | 27.725759    |
| 89   | Fujian    | Wuyishan <sup>85</sup>            | fjwys    | orogenic      | Granitic      | 565.3                   | 117.719879    | 27.746746    |
| 90   | Jiangxi   | Matoushan <sup>86</sup>           | jxmts    | orogenic      | Granitic      | 138.7                   | 117.245081    | 27.796775    |
| 91   | Jiangxi   | Yangjifeng <sup>87</sup>          | jxyjf    | orogenic      | Granitic      | 109.5                   | 117.344803    | 27.919907    |
| 92   | Jiangxi   | Wuyishan <sup>88</sup>            | jxwys    | orogenic      | Granitic      | 160.1                   | 117.705870    | 28.307835    |
| 93   | Hunan     | Daweishan <sup>89</sup>           | hndws    | craton        | Granitic      | 62.9                    | 113.800484    | 28.485315    |
| 94   | Jiangxi   | Guanshan <sup>90</sup>            | jxgs     | craton        | Granitic      | 115.0                   | 114.552236    | 28.542096    |
| 95   | Hunan     | Xiaoxi <sup>91</sup>              | hnxx     | craton        | Granitic      | 248.0                   | 110.194214    | 28.812598    |
| 96   | Jiangxi   | Sanqingshan <sup>92</sup>         | jxsqs    | craton        | Granitic      | 756.6                   | 118.055159    | 28.910956    |
| 97   | Hunan     | Mufushan <sup>93</sup>            | hnmfs    | craton        | Granitic      | 85.3                    | 113.829362    | 28.970395    |
| 98   | Jiangxi   | Jiulingshan <sup>94</sup>         | jxljngs  | craton        | Granitic      | 115.4                   | 115.175369    | 29.079383    |
| 99   | Jiangxi   | Yishan <sup>95</sup>              | jxys     | craton        | Granitic      | 115.1                   | 115.025055    | 29.371792    |
| 100  | Hubei     | Jiugongshan <sup>96</sup>         | hbjgs    | craton        | Granitic      | 166.1                   | 114.603388    | 29.376972    |
| 101  | Jiangxi   | Lushan <sup>97</sup>              | jxls     | craton        | Granitic      | 292.3                   | 115.977656    | 29.545054    |
| 102  | Chongqing | Jinyunshan <sup>98</sup>          | cjjys    | craton        | Granitic      | 76.0                    | 106.384231    | 29.848558    |
| 103  | Anhui     | Qingliangfeng <sup>99</sup>       | ahqlf    | craton        | Granitic      | 78.1                    | 118.862287    | 30.101334    |
| 104  | Anhui     | Huangshan <sup>100</sup>          | ahhs     | craton        | Granitic      | 160.0                   | 118.156407    | 30.129679    |
| 105  | Zhejiang  | Tianmushan <sup>101</sup>         | zjtms    | craton        | Granitic      | 43.0                    | 119.409571    | 30.353817    |
| 106  | Anhui     | Dabieshan <sup>102</sup>          | db       | orogenic      | Granitic      | 15293.0                 | 115.774113    | 31.257177    |
| 107  | Chongqing | Yintiaoling <sup>103</sup>        | cqytl    | craton        | karst-gr      | 224.2                   | 109.931515    | 31.467145    |
| 108  | Sichuan   | Tangjiahe <sup>104</sup>          | setjh    | orogenic      | Granitic      | 400.0                   | 104.755738    | 32.589005    |
| 109  | Henan     | Gaoleshan <sup>105</sup>          | hngls    | orogenic      | Granitic      | 90.6                    | 113.618626    | 32.661778    |
| 110  | Shannxi   | Motianling <sup>106</sup>         | sxmtl    | orogenic      | Granitic      | 85.2                    | 108.034842    | 32.731580    |
| 111  | Gansu     | Yuhe <sup>107</sup>               | gsyh     | orogenic      | Granitic      | 510.6                   | 105.442238    | 32.995141    |
| 112  | Shannxi   | Xinkailing <sup>108</sup>         | sxxkl    | orogenic      | Granitic      | 149.9                   | 110.698440    | 33.366687    |
| 113  | Shannxi   | Pingheliang <sup>109</sup>        | sxphl    | orogenic      | Granitic      | 211.5                   | 108.367164    | 33.400144    |
| 114  | Shannxi   | Changqingshan <sup>110</sup>      | sxcqs    | orogenic      | Granitic      | 300.0                   | 107.507497    | 33.618564    |
| 115  | Shannxi   | Taibaishan <sup>111</sup>         | sxtbs    | orogenic      | Granitic      | 563.3                   | 107.561869    | 33.930257    |
| 116  | Shandong  | Taishan <sup>112</sup>            | sdts     | craton        | Granitic      | 242.0                   | 117.083812    | 36.263112    |
| 117  | Hebei     | Tuoliang <sup>113</sup>           | hbt      | craton        | Granitic      | 213.1                   | 113.811522    | 38.724818    |
| 118  | Beijing   | Yunmengshan <sup>114</sup>        | bjyms    | craton        | Granitic      | 22.1                    | 116.812576    | 40.545743    |
| 119  | Liaoning  | Baishilizi <sup>115</sup>         | lnbslz   | craton        | Granitic      | 74.7                    | 124.876008    | 40.926903    |
| 120  | Hebei     | Maojingba <sup>116</sup>          | hbmjb    | craton        | Granitic      | 400.4                   | 118.167158    | 41.676071    |
| 121  | Hainan    | Wangxia <sup>117</sup>            | hnwxshy  | orogenic      | Karst         | 10.0                    | 109.046215    | 19.068908    |
| 122  | Guangxi   | Nonggang <sup>118</sup>           | gxng     | craton        | Karst         | 100.8                   | 106.944879    | 22.485805    |
| 123  | Guangxi   | Longhushan <sup>119</sup>         | gxlhs    | craton        | Karst         | 22.6                    | 107.628250    | 23.012756    |

| Num. | Province  | Mountain flora                  | Acronym | Tectonic type | Landform type | Area (km <sup>2</sup> ) | Longitude (E) | Latitude (N) |
|------|-----------|---------------------------------|---------|---------------|---------------|-------------------------|---------------|--------------|
| 124  | Guangxi   | Laohutiao <sup>120</sup>        | gxlht   | craton        | Karst         | 270.1                   | 105.710269    | 23.100987    |
| 125  | Guizhou   | Xingyipogang <sup>121</sup>     | gzxypg  | craton        | Karst         | 167.6                   | 105.098666    | 25.112122    |
| 126  | Guangxi   | Mulun <sup>122</sup>            | gxml    | craton        | Karst         | 90.0                    | 108.054318    | 25.147779    |
| 127  | Guizhou   | Wangmo <sup>123</sup>           | gzwm    | craton        | Karst         | 300.0                   | 106.367952    | 25.234082    |
| 128  | Guizhou   | Maolan <sup>124</sup>           | gzml    | craton        | Karst         | 212.9                   | 107.925745    | 25.246513    |
| 129  | Guizhou   | Badashan <sup>125</sup>         | gzbdsh  | craton        | Karst         | 260.0                   | 104.835215    | 25.996729    |
| 130  | Guizhou   | Meitanbaimianshu <sup>126</sup> | gzmtbms | craton        | Karst         | 185.0                   | 107.375311    | 27.529538    |
| 131  | Guizhou   | Sinansiyetun <sup>127</sup>     | gznsyt  | craton        | Karst         | 174.0                   | 107.990337    | 27.896504    |
| 132  | Guizhou   | Kuankuoshui <sup>128</sup>      | gzkks   | craton        | Karst         | 262.3                   | 107.195465    | 28.243703    |
| 133  | Hunan     | Dehang <sup>129</sup>           | hndh    | craton        | Karst         | 108.5                   | 109.587340    | 28.344720    |
| 134  | Guizhou   | Mayanghe <sup>130</sup>         | gzmyh   | craton        | Karst         | 311.1                   | 108.109589    | 28.623104    |
| 135  | Chongqing | Jinfoshan <sup>131</sup>        | cqjfs   | craton        | Karst         | 418.5                   | 107.181002    | 29.043814    |
| 136  | Guizhou   | Dashahe <sup>132</sup>          | gzdsh   | craton        | Karst         | 269.9                   | 107.603336    | 29.155062    |
| 137  | Hunan     | Wulongshan <sup>133</sup>       | hnwls   | craton        | Karst         | 402.0                   | 109.326685    | 29.210095    |
| 138  | Hubei     | Qizimeishan <sup>134</sup>      | hbqzms  | craton        | Karst         | 345.5                   | 109.746612    | 30.027216    |
| 139  | Hubei     | Jingshanyumai <sup>135</sup>    | hbjsym  | craton        | Karst         | 2231.0                  | 112.221616    | 30.998712    |
| 140  | Guangdong | Qiniangshan <sup>136,137</sup>  | gdqns   | orogenic      | Granitic      | 46.1                    | 114.545361    | 22.522300    |

**Supplementary Table 2** Predictor variables and explanatory variables.

| Variables                                      | Meaning of each variable                                                           |
|------------------------------------------------|------------------------------------------------------------------------------------|
| <b>Predictor variables</b>                     |                                                                                    |
| sp.number                                      | species richness, the total number of angiosperm plants in a mountain              |
| NRI                                            | standardized effect size of mean phylogenetic distance                             |
| NTI                                            | standardized effect size of mean nearest taxon distance                            |
| PDI                                            | standardized effect size of phylogenetic diversity ( $PD_{Faith}$ )                |
| MDT                                            | mean diversity time of species in a mountain                                       |
| MDT.oldest                                     | mean diversity time of 25% oldest species in a mountain                            |
| MDT.youngest                                   | mean diversity time of 25% youngest species in a mountain                          |
| <b>Explanatory variables</b>                   |                                                                                    |
| Landform                                       | the landform type of a mountain (included 5 variable, see method)                  |
| Tectonic                                       | the tectonic zone which a mountain located (craton and orogenic)                   |
| Geographic (included the following 5 variable) |                                                                                    |
| area                                           | mountain area of hectares                                                          |
| lat                                            | latitude                                                                           |
| long                                           | longitude                                                                          |
| elevdiff                                       | difference value between the highest elevation and lowest elevation                |
| elevmid                                        | average of highest elevation and lowest elevation of a mountain                    |
| Climate (included the following 19 variable)   |                                                                                    |
| bio1                                           | Annual Mean Temperature [excluded, $r$ with bio11 = 0.9609]                        |
| bio2                                           | Mean Diurnal Range                                                                 |
| bio3                                           | Isothermality (bio2/bio7) (*100) (Isoth)                                           |
| bio4                                           | Temperature Seasonality (standard deviation*100)[excluded, $r$ with bio7 = 0.9822] |
| bio5                                           | Max Temperature of Warmest Month [excluded, $r$ with bio10 = 0.9815]               |
| bio6                                           | Min Temperature of Coldest Month [excluded, $r$ with bio11 = 0.9970]               |
| bio7                                           | Temperature Annual Range (TAR, bio5-bio6)                                          |
| bio8                                           | Mean Temperature of Wettest Quarter                                                |
| bio9                                           | Mean Temperature of Driest Quarter [excluded, $r$ with bio11 = 0.9873]             |
| bio10                                          | Mean Temperature of Warmest Quarter (TWQ)                                          |
| bio11                                          | Mean Temperature of Coldest Quarter (TCQ)                                          |
| bio12                                          | Annual Precipitation                                                               |
| bio13                                          | Precipitation of Wettest Month                                                     |
| bio14                                          | Precipitation of Driest Month [excluded, $r$ with bio19 = 0.9938]                  |
| bio15                                          | Precipitation Seasonality (Coefficient of Variation)                               |
| bio16                                          | Precipitation of Wettest Quarter [excluded, $r$ with bio12 = 0.9547]               |
| bio17                                          | Precipitation of Driest Quarter [excluded, $r$ with bio19 = 0.9910]                |
| bio18                                          | Precipitation of Warmest Quarter                                                   |
| bio19                                          | Precipitation of Coldest Quarter                                                   |

**Supplementary Table 3** The out put of negative binomial generalized linear model for mountain species richness (SR).

| Explanatory variables | GLM                 |                    | SEM                 |                    |
|-----------------------|---------------------|--------------------|---------------------|--------------------|
|                       | Coefficient         | <i>t</i>           | Coefficient         | <i>z</i>           |
| <b>landform model</b> |                     |                    |                     |                    |
| Intercept             | 6.945               | 61.43***           | 6.899               | 59.86***           |
| Desert                | -0.456              | -3.04***           | -0.356              | -2.22*             |
| Granitic              | 0.290               | 2.42*              | 0.338               | 2.85**             |
| Karst                 | 0.155               | 1.11 <sup>ns</sup> | 0.193               | 1.35 <sup>ns</sup> |
| Karst-Granitic        | 0.355               | 2.40*              | 0.415               | 2.75**             |
| Deviance, %           | 28.95               |                    | 31.40               |                    |
| AIC                   | 116.21              |                    | 115                 |                    |
| Moran's I             | 0.096*              |                    | 0.002 <sup>ns</sup> |                    |
| <b>full model</b>     |                     |                    |                     |                    |
| Intercept             | 6.707               | 34.20***           | 6.730               | 35.09***           |
| Longitude             | 1.052               | 4.69***            | 1.033               | 4.36***            |
| Elevdiff              | 1.121               | 4.70***            | 1.097               | 4.83***            |
| TWQ                   | -1.137              | -4.34***           | -1.162              | -4.51***           |
| P <sub>var</sub>      | -0.616              | 4.40***            | -0.614              | -4.16***           |
| Danxia:TCQ            | 0.693               | 3.00**             | 0.693               | 2.87**             |
| Desert:TCQ            | -2.788              | -2.99**            | -2.704              | -3.01**            |
| Granitic:TCQ          | 0.913               | 4.92***            | 0.938               | 4.72***            |
| Karst:TCQ             | 0.959               | 4.56***            | 0.948               | 4.31***            |
| Karst-Gr:TCQ          | 1.073               | 4.70***            | 1.122               | 4.66***            |
| Deviance, %           | 62.8                |                    | 63.71(62.69)        |                    |
| AIC                   | 35.75               |                    | 35.39               |                    |
| Moran's I             | 0.080 <sup>ns</sup> |                    | 0.004 <sup>ns</sup> |                    |

The SR is log-transformed species richness. The landform effects were coded in reference to the Danxia landform (the intercept). We applied mixed-effects modelling approach (two-sided). The model was selected by stepwise procedure using the criterion of AIC. TWQ (Mean Temperature of Warmest Quarter); TCQ (Mean Temperature of Coldest Quarter); P<sub>var</sub> (Precipitation Seasonality). \*\*\*p<.001; \*\*p<.01; \*p<.05; ns=not significant.

**Supplementary Table 4** The out put of multiple regression models for PDI.

| Explanatory variables | GLM                 |                    | SEM                  |                     |
|-----------------------|---------------------|--------------------|----------------------|---------------------|
|                       | Coefficient         | <i>t</i>           | Coefficient          | <i>z</i>            |
| <b>landform model</b> |                     |                    |                      |                     |
| Intercept             | -3.022              | -3.53***           | -3.536               | -3.89***            |
| Desert                | -13.270             | -11.65***          | -9.256               | -7.06***            |
| Granitic              | 0.880               | 0.97 <sup>ns</sup> | 1.139                | 1.36 <sup>ns</sup>  |
| Karst                 | 1.877               | 1.77 <sup>ns</sup> | 1.711                | 1.62 <sup>ns</sup>  |
| Karst-Granitic        | 1.113               | 0.99 <sup>ns</sup> | 1.166                | 1.05 <sup>ns</sup>  |
| Deviance, %           | 70.89               |                    | 77.15 (70.85)        |                     |
| AIC                   | 683.21              |                    | 667.89               |                     |
| Moran's I             | 0.188***            |                    | -0.029 <sup>ns</sup> |                     |
| <b>full model</b>     |                     |                    |                      |                     |
| Intercept             | 15.405              | 2.93**             | 15.832               | 2.94**              |
| Desert                | -2.695              | -2.47*             | -2.062               | -1.88 <sup>ns</sup> |
| Granitic              | 1.865               | 2.96**             | 2.007                | 3.29**              |
| Karst                 | 1.295               | 1.66 <sup>ns</sup> | 1.423                | 1.86 <sup>ns</sup>  |
| Karst-Granitic        | 1.917               | 2.26*              | 2.001                | 2.41*               |
| Orogenic              | -1.417              | -3.95***           | -1.377               | -3.66***            |
| Latitude              | -11.386             | -5.04***           | -11.294              | -5.02***            |
| TAR                   | -32.080             | -4.51***           | -33.889              | -4.66***            |
| TWQ                   | 30.880              | 6.70***            | 32.407               | 6.80***             |
| TCQ                   | -39.838             | -4.73***           | -41.484              | -4.77***            |
| Deviance, %           | 88.09               |                    | 88.25 (88.04)        |                     |
| AIC                   | 568.51              |                    | 569.40               |                     |
| Moran's I             | 0.047 <sup>ns</sup> |                    | 0.002 <sup>ns</sup>  |                     |

The landform effects were coded in reference to the Danxia landform (the intercept). The effect of orogen (i.e., tectonic effect) is in reference to craton. We applied mixed-effects modelling approach (two-sided). The model was selected by stepwise procedure using the criterion of AIC. TAR (Temperature Annual Range); TWQ (Mean Temperature of Warmest Quarter); TCQ (Mean Temperature of Coldest Quarter). \*\*\* $p < .001$ ; \*\* $p < .01$ ; \* $p < .05$ ; ns=not significant.

**Supplementary Table 5** The output of multiple regression models for MDT.

| Explanatory variables | GLM         |          | SEM                         |                     |
|-----------------------|-------------|----------|-----------------------------|---------------------|
|                       | Coefficient | <i>t</i> | Coefficient                 | <i>z</i>            |
| <b>landform model</b> |             |          |                             |                     |
| Intercept             | 7.848       | 39.48*** | 7.801                       | 39.78***            |
| Desert                | -0.873      | -3.30**  | -0.112                      | -0.43 <sup>ns</sup> |
| Granitic              | 0.778       | 3.70***  | 0.821                       | 5.33***             |
| Karst                 | 1.038       | 4.23***  | 0.931                       | 4.70***             |
| Karst-Granitic        | 0.962       | 3.70***  | 0.842                       | 4.03***             |
| Deviance, %           | 42.78       |          | 71.76 (landform only 39.38) |                     |
| AIC                   | 274.24      |          | 205.79                      |                     |
| Moran's I             | 0.509***    |          | -0.040 <sup>ns</sup>        |                     |
| <b>full model</b>     |             |          |                             |                     |
| Intercept             | 12.137      | 9.76***  | 12.197                      | 9.40***             |
| Desert                | 0.629       | 2.41*    | 0.638                       | 2.43*               |
| Granitic              | 0.663       | 4.42***  | 0.682                       | 4.70***             |
| Karst                 | 0.799       | 4.58***  | 0.814                       | 4.74***             |
| Karst-Granitic        | 0.775       | 4.00***  | 0.768                       | 4.04***             |
| Latitude              | -2.098      | -3.89*** | -2.190                      | -4.03***            |
| Elevdiff              | 0.980       | 2.67**   | 0.929                       | 2.62**              |
| TAR                   | -6.5101     | -3.86*** | -6.508                      | -3.71***            |
| TWQ                   | 3.7196      | 3.32**   | 3.890                       | -3.31***            |
| TCQ                   | -6.1052     | 2.01**   | -6.359                      | -3.00**             |
| Deviance, %           | 75.52       |          | 76.38 (75.44)               |                     |
| AIC                   | 165.36      |          | 164.21                      |                     |
| Moran's I             | 0.089*      |          | 0.010 <sup>ns</sup>         |                     |

The landform effects were coded in reference to the Danxia landform (the intercept). We applied mixed-effects modelling approach (two-sided). The model was selected by stepwise procedure using the criterion of AIC. TAR (Temperature Annual Range); TWQ (Mean Temperature of Warmest Quarter); TCQ (Mean Temperature of Coldest Quarter). \*\*\* $p < .001$ ; \*\* $p < .01$ ; \* $p < .05$ ; ns=not significant.



**Supplementary Table 6** The output of multiple regression models for MDT<sub>.oldest</sub>.

| Explanatory variables | GLM         |                    | SEM                         |                     |
|-----------------------|-------------|--------------------|-----------------------------|---------------------|
|                       | Coefficient | <i>t</i>           | Coefficient                 | <i>z</i>            |
| <b>landform model</b> |             |                    |                             |                     |
| Intercept             | 22.049      | 44.21***           | 21.631                      | 41.86***            |
| Desert                | -2.783      | -4.20***           | -0.678                      | -0.91 <sup>ns</sup> |
| Granitic              | 2.120       | 4.02***            | 2.527                       | 5.41**              |
| Karst                 | 2.370       | 3.85***            | 2.462                       | 4.16***             |
| Karst-Granitic        | 2.611       | 4.00***            | 2.551                       | 4.08***             |
| Deviance, %           | 49.08       |                    | 62.83 (landform only 45.49) |                     |
| AIC                   | 531.76      |                    | 506.76                      |                     |
| Moran's I             | 0.272***    |                    | -0.012 <sup>ns</sup>        |                     |
| <b>full model</b>     |             |                    |                             |                     |
| Intercept             | 25.588      | 32.57***           | 25.474                      | 31.47***            |
| Desert                | 0.909       | 1.22 <sup>ns</sup> | 1.242                       | 1.61 <sup>ns</sup>  |
| Granitic              | 2.304       | 5.14***            | 2.460                       | 5.61***             |
| Karst                 | 2.251       | 4.27***            | 2.337                       | 4.43***             |
| Karst-Granitic        | 2.808       | 5.08***            | 2.757                       | 4.99***             |
| Latitude              | -3.579      | -2.66**            | -4.150                      | -2.97**             |
| Isothermality         | -2.561      | -3.17**            | -2.636                      | -3.01**             |
| TAR                   | -4.347      | -2.46*             | -3.824                      | -2.24*              |
| Deviance, %           | 65.69       |                    | 67.05 (65.52)               |                     |
| AIC                   | 482.49      |                    | 480.88                      |                     |
| Moran's I             | 0.096*      |                    | 0.008 <sup>ns</sup>         |                     |

The landform effects were coded in reference to the Danxia landform (the intercept). We applied mixed-effects modelling approach (two-sided). The model was selected by stepwise procedure using the criterion of AIC. TAR (Temperature Annual Range). \*\*\* $p < .001$ ; \*\* $p < .01$ ; \* $p < .05$ ; ns=not significant.

**Supplementary Table 7** The output of multiple regression models for MDT<sub>youngest</sub>.

| Explanatory variables | GLM         |                    | SEM                  |                     |
|-----------------------|-------------|--------------------|----------------------|---------------------|
|                       | Coefficient | <i>t</i>           | Coefficient          | <i>z</i>            |
| <b>landform model</b> |             |                    |                      |                     |
| Intercept             | 0.663       | 13.72***           | 0.685                | 14.76***            |
| Desert                | -0.183      | -2.86**            | -0.061               | -1.40 <sup>ns</sup> |
| Granitic              | 0.064       | 1.25 <sup>ns</sup> | 0.034                | 1.38 <sup>ns</sup>  |
| Karst                 | 0.150       | 2.52*              | 0.107                | 3.38***             |
| Karst-Granitic        | 0.078       | 1.23 <sup>ns</sup> | 0.061                | 1.82 <sup>ns</sup>  |
| Deviance, %           | 23.20       |                    | 84.04(21.01)         |                     |
| AIC                   | -122.08     |                    | -292.75              |                     |
| Moran's I             | 0.775***    |                    | -0.088*              |                     |
| <b>full model</b>     |             |                    |                      |                     |
| Intercept             | 2.566       | 8.06***            | 1.500                | 4.50***             |
| Desert                | 0.190       | 3.70***            | 0.054                | 1.15 <sup>ns</sup>  |
| Granitic              | 0.034       | 1.15 <sup>ns</sup> | 0.017                | 0.73 <sup>ns</sup>  |
| Karst                 | 0.094       | 2.52*              | 0.097                | 3.28**              |
| Karst-Granitic        | 0.059       | 1.47 <sup>ns</sup> | 0.068                | 2.09*               |
| Orogenic              | 0.058       | 3.39***            | 0.015                | 0.72 <sup>ns</sup>  |
| Latitude              | -0.412      | -3.73***           | -0.154               | -1.30 <sup>ns</sup> |
| Isothermality         | 0.561       | 6.24***            | 0.100                | 0.93 <sup>ns</sup>  |
| TAR                   | -3.328      | -7.08***           | -1.445               | -2.79**             |
| TWQ                   | 2.370       | 6.37***            | 0.773                | 1.90 <sup>ns</sup>  |
| TCQ                   | -3.813      | -6.03***           | -1.262               | -1.84 <sup>ns</sup> |
| Deviance, %           | 78.24       |                    | 86.45(69.65)         |                     |
| AIC                   | -286.65     |                    | -323.21              |                     |
| Moran's I             | 0.249***    |                    | -0.049 <sup>ns</sup> |                     |

The landform effects were coded in reference to the Danxia landform (the intercept). We applied mixed-effects modelling approach (two-sided). The model was selected by stepwise procedure using the criterion of AIC. TAR (Temperature Annual Range); TWQ (Mean Temperature of Warmest Quarter); TCQ (Mean Temperature of Coldest Quarter). \*\*\* $p < .001$ ; \*\* $p < .01$ ; \* $p < .05$ ; ns=not significant.

**Supplementary Table 8** The out put of multiple regression models for NRI.

| Explanatory variables | GLM                 |                     | SEM                  |                     |
|-----------------------|---------------------|---------------------|----------------------|---------------------|
|                       | Coefficient         | <i>t</i>            | Coefficient          | <i>z</i>            |
| <b>landform model</b> |                     |                     |                      |                     |
| Intercept             | -0.897              | -1.21 <sup>ns</sup> | 0.181                | 0.22 <sup>ns</sup>  |
| Desert                | 10.779              | -10.97***           | 4.856                | 4.41***             |
| Granitic              | -0.098              | -0.13 <sup>ns</sup> | -0.820               | -1.25 <sup>ns</sup> |
| Karst                 | 0.392               | 0.43 <sup>ns</sup>  | 0.369                | 0.445 <sup>ns</sup> |
| Karst-Granitic        | 0.538               | 0.56 <sup>ns</sup>  | -0.072               | -0.08 <sup>ns</sup> |
| Deviance, %           | 64.91               |                     | 77.43 (61.80)        |                     |
| AIC                   | 641.92              |                     | 611.16               |                     |
| Moran's I             | 0.221*              |                     | -0.056 <sup>ns</sup> |                     |
| <b>full model</b>     |                     |                     |                      |                     |
| Intercept             | -15.180             | -2.70**             | -15.735              | -2.60**             |
| Desert                | 2.794               | 2.40*               | 1.406                | 1.22 <sup>ns</sup>  |
| Granitic              | -0.549              | -0.86 <sup>ns</sup> | -0.791               | -1.31 <sup>ns</sup> |
| Karst                 | 0.032               | 0.04 <sup>ns</sup>  | 0.213                | 0.29 <sup>ns</sup>  |
| Karst-Granitic        | -0.345              | -0.41 <sup>ns</sup> | -0.363               | -0.45 <sup>ns</sup> |
| Longitude             | -4.525              | -2.98**             | -5.140               | -2.89**             |
| Latitude              | 10.077              | 4.33***             | 10.232               | 4.30***             |
| TAR                   | 24.221              | 3.32**              | 26.682               | 3.43***             |
| TWQ                   | -18.162             | -3.66***            | -19.272              | -3.59***            |
| TCQ                   | 29.495              | 3.34**              | 31.057               | 3.23**              |
| Deviance, %           | 80.01               |                     | 81.51 (79.58)        |                     |
| AIC                   | 573.12              |                     | 568.01               |                     |
| Moran's I             | 0.136 <sup>ns</sup> |                     | -0.005 <sup>ns</sup> |                     |

The landform effects were coded in reference to the Danxia landform (the intercept). The effect of orogen (i.e., tectonic effect) is in reference to craton. We applied mixed-effects modelling approach (two-sided). The model was selected by stepwise procedure using the criterion of AIC. TAR (Temperature Annual Range); TWQ (Mean Temperature of Warmest Quarter); TCQ (Mean Temperature of Coldest Quarter). \*\*\* $p < .001$ ; \*\* $p < .01$ ; \* $p < .05$ ; ns=not significant.

**Supplementary Table 9** The out put of multiple regression models for NTI.

| Explanatory variables | GLM                 |                     | SEM                  |                     |
|-----------------------|---------------------|---------------------|----------------------|---------------------|
|                       | Coefficient         | <i>t</i>            | Coefficient          | <i>z</i>            |
| <b>landform model</b> |                     |                     |                      |                     |
| Intercept             | 4.987               | 8.34***             | 4.886                | 7.91***             |
| Desert                | 6.062               | 7.62***             | 5.019                | 5.64***             |
| Granitic              | -1.297              | -2.05*              | -1.135               | -1.86 <sup>ns</sup> |
| Karst                 | -1.871              | -2.53*              | -1.545               | -2.05*              |
| Karst-Granitic        | -1.486              | -1.90 <sup>ns</sup> | -1.085               | -1.36 <sup>ns</sup> |
| Deviance, %           | 57.88               |                     | 62.71 (57.81)        |                     |
| AIC                   | 582.49              |                     | 574.53               |                     |
| Moran's I             | 0.163**             |                     | -0.013 <sup>ns</sup> |                     |
| <b>full model</b>     |                     |                     |                      |                     |
| Intercept             | -11.404             | -2.36*              | -11.283              | -2.32*              |
| Desert                | 0.587               | 0.64                | 0.384                | 0.42 <sup>ns</sup>  |
| Granitic              | -1.795              | -3.36**             | -1.802               | -3.50***            |
| Karst                 | -0.855              | -1.28               | -0.936               | -1.45 <sup>ns</sup> |
| Karst-Granitic        | -1.326              | -1.84               | -1.337               | -1.91 <sup>ns</sup> |
| Orogenic              | 0.869               | 2.86**              | 0.856                | 2.77**              |
| Latitude              | 8.057               | 3.70***             | 7.958                | 3.70***             |
| TAR                   | 23.394              | 3.80***             | 23.706               | 3.84***             |
| TWQ                   | -19.777             | -4.82***            | -20.146              | -4.88***            |
| TCQ                   | 26.993              | 3.64***             | 27.344               | 3.65***             |
| PREC                  | 3.252               | 3.02**              | 3.041                | 2.86**              |
| Deviance, %           | 75.03               |                     | 75.19 (75.00)        |                     |
| AIC                   | 521.27              |                     | 522.74               |                     |
| Moran's I             | 0.034 <sup>ns</sup> |                     | 0.002 <sup>ns</sup>  |                     |

The landform effects were coded in reference to the Danxia landform (the intercept). The effect of orogen (i.e., tectonic effect) is in reference to craton. We applied mixed-effects modelling approach (two-sided). The model was selected by stepwise procedure using the criterion of AIC. TAR (Temperature Annual Range); TWQ (Mean Temperature of Warmest Quarter); TCQ (Mean Temperature of Coldest Quarter); PREC(Annual Precipitation). \*\*\* $p < .001$ ; \*\* $p < .01$ ; \* $p < .05$ ; ns=not significant.

**Supplementary Table 10** Results of the interactions between landform and others variables on the species richness (SR).

| Variables                 | GLM         |       |           | SEM         |       |           |
|---------------------------|-------------|-------|-----------|-------------|-------|-----------|
|                           | Coefficient | SE    | <i>t</i>  | Coefficient | SE    | <i>z</i>  |
| TWQ                       | 0.206       | 0.187 | 1.106ns   | -1.072      | 0.229 | -4.691*** |
| TCQ                       | 0.760       | 0.153 | 4.956***  | 0.668       | 0.179 | 3.733***  |
| PREC                      | 0.957       | 0.132 | 7.269***  | 0.968       | 0.151 | 6.428***  |
| PCQ                       | 0.498       | 0.117 | 4.275***  | 0.466       | 0.150 | 3.102***  |
| Landform*TCQ (Intercept)  | 7.747       | 1.171 | 6.616***  | 8.141       | 1.130 | 7.2***    |
| Desert                    | -0.513      | 1.183 | -0.434ns  | -0.859      | 1.142 | -0.752ns  |
| Granitic                  | -0.935      | 1.179 | -0.793ns  | -1.325      | 1.139 | -1.163ns  |
| Karst                     | -0.212      | 1.251 | -0.169ns  | -0.634      | 1.206 | -0.526ns  |
| Karst-Gr                  | 1.020       | 1.324 | 0.771ns   | 0.399       | 1.283 | 0.311ns   |
| TCQ                       | -1.113      | 1.620 | -0.687ns  | -1.724      | 1.573 | -1.096ns  |
| Desert:TCQ                | -5.291      | 2.025 | -2.613ns  | -4.812      | 1.920 | -2.506*   |
| Granitic:TCQ              | 1.767       | 1.633 | 1.082*    | 2.367       | 1.587 | 1.492ns   |
| Karst:TCQ                 | 0.488       | 1.736 | 0.281ns   | 1.152       | 1.683 | 0.685ns   |
| Karst-Gr:TCQ              | -1.384      | 1.925 | -0.719ns  | -0.329      | 1.879 | -0.175ns  |
| Landform*PREC (Intercept) | 7.765       | 0.997 | 6.784***  | 6.320       | 0.907 | 6.948***  |
| Desert                    | -0.702      | 1.018 | -0.689ns  | -0.584      | 0.942 | -0.620ns  |
| Granitic                  | 0.0153      | 1.006 | 0.015ns   | 0.523       | 0.918 | 0.570ns   |
| Karst                     | -0.607      | 1.195 | -0.509ns  | -0.449      | 1.084 | -0.414ns  |
| Karst-Gr                  | 0.517       | 1.088 | 0.475ns   | 1.008       | 0.980 | 1.029ns   |
| PREC                      | 0.274       | 1.505 | 0.182ns   | 0.888       | 1.371 | 0.648ns   |
| Desert:PREC               | 3.950       | 2.368 | 1.668ns   | 6.115       | 2.372 | 2.578**   |
| Granitic:PREC             | 0.408       | 1.516 | 0.269ns   | -0.268      | 1.380 | -0.194ns  |
| Karst:PREC                | 1.497       | 1.941 | 0.771ns   | 1.381       | 1.766 | 0.782ns   |
| Karst-Gr:PREC             | -0.240      | 1.706 | -0.140ns  | -0.942      | 1.538 | -0.612ns  |
| Landform*PCQ (Intercept)  | 6.821       | 0.485 | 14.071*** | 6.643       | 0.474 | 14.005*** |
| Desert                    | -0.765      | 0.511 | -1.495ns  | -0.563      | 0.501 | -1.124ns  |
| Granitic                  | 0.231       | 0.491 | 0.471ns   | 0.391       | 0.480 | 0.816ns   |
| Karst                     | 0.148       | 0.572 | 0.259ns   | 0.292       | 0.554 | 0.527ns   |
| Karst-Gr                  | 0.690       | 0.516 | 1.338ns   | 0.899       | 0.499 | 1.801ns   |
| PCQ                       | 0.192       | 0.730 | 0.263ns   | 0.430       | 0.711 | 0.605ns   |
| Desert:PCQ                | 13.196      | 4.178 | 3.158**   | 14.191      | 4.023 | 3.528***  |
| Granitic:PCQ              | 0.159       | 0.742 | 0.214ns   | -0.040      | 0.718 | -0.055ns  |
| Karst:PCQ                 | 0.261       | 1.248 | 0.209ns   | 0.057       | 1.195 | 0.048ns   |
| Karst-Gr:PCQ              | -0.968      | 0.918 | -1.055ns  | -1.298      | 0.879 | -1.480ns  |

The SR is log-transformed species richness. We applied mixed-effects modelling approach (two-sided). TWQ (Mean Temperature of Warmest Quarter); TCQ (Mean Temperature of Coldest Quarter); PCQ (Precipitation of Coldest Quarter). There are interaction effects between landform effect and other variables. \*\*\* $p < .001$ ; \*\* $p < .01$ ; \* $p < .05$ ; ns=not significant.

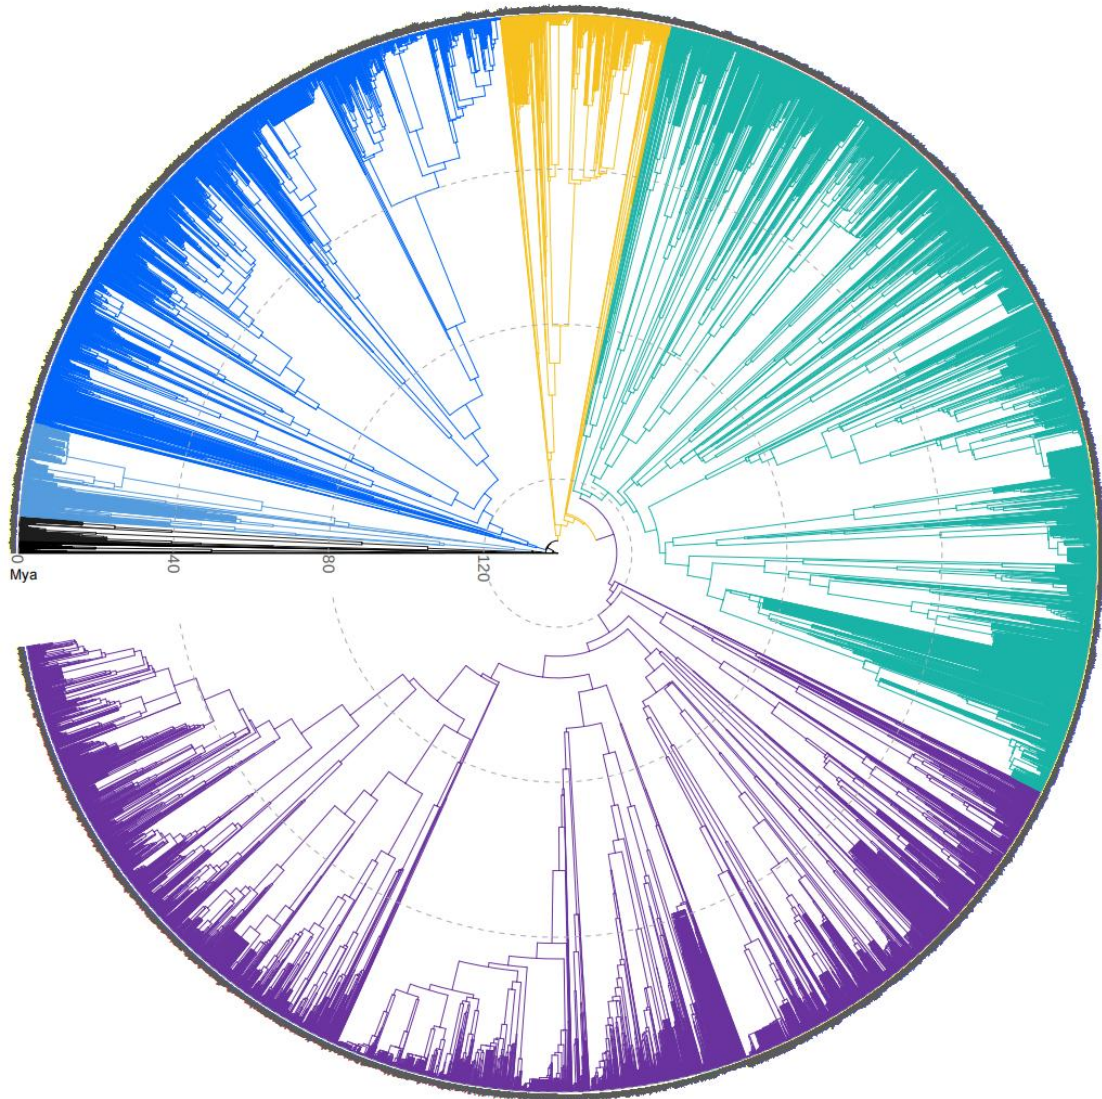

**Supplementary Fig. 1 Dated megaphylogeny in this study.** The color of branch represent major angiosperm clade based on APG IV (black, ANATA; light blue, magnoliids; blue, monocots; orange, basal eudicots; green, superrosids; purple, superasterids). Divergence times were estimated using GBOTB<sup>138,139</sup>. The original image file could be found at <https://itol.embl.de/export/1836994402281644388267>.

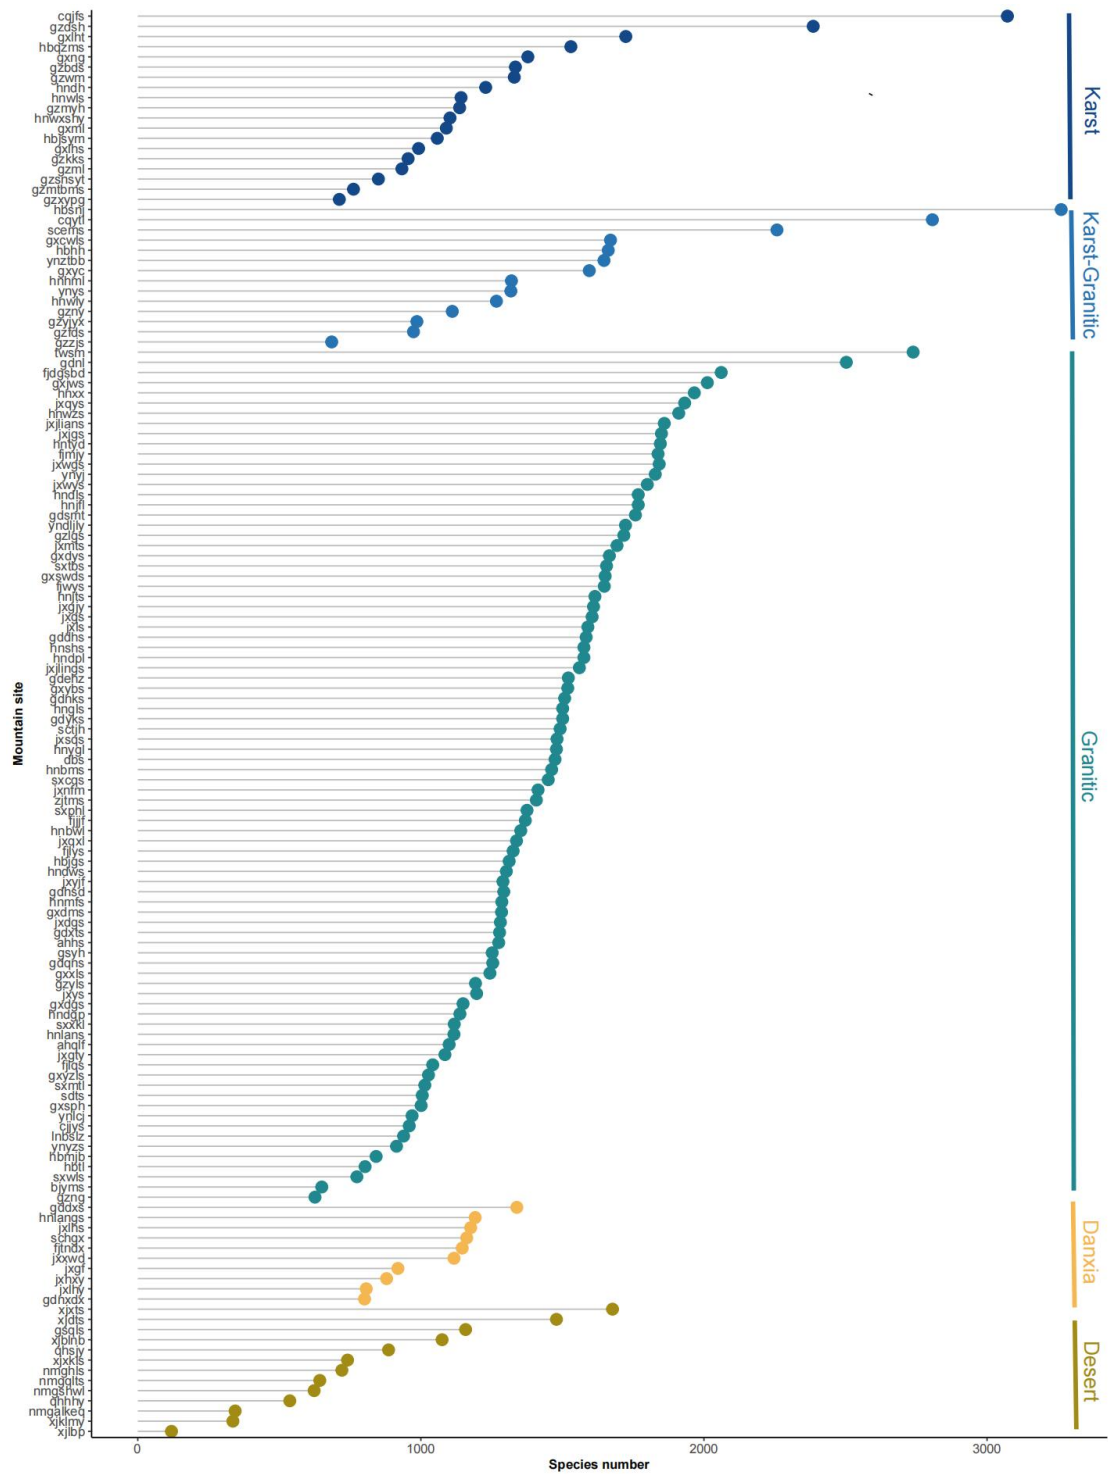

**Supplementary Fig. 2** Species richness of the 140 mountain floras in this study. The sample sizes ( $n$ ) for Danxia, Desert, Granitic, Karst, Karst-Granitic are 10, 13, 84, 19 and 14, respectively. Source data are provided as a Source Data file.

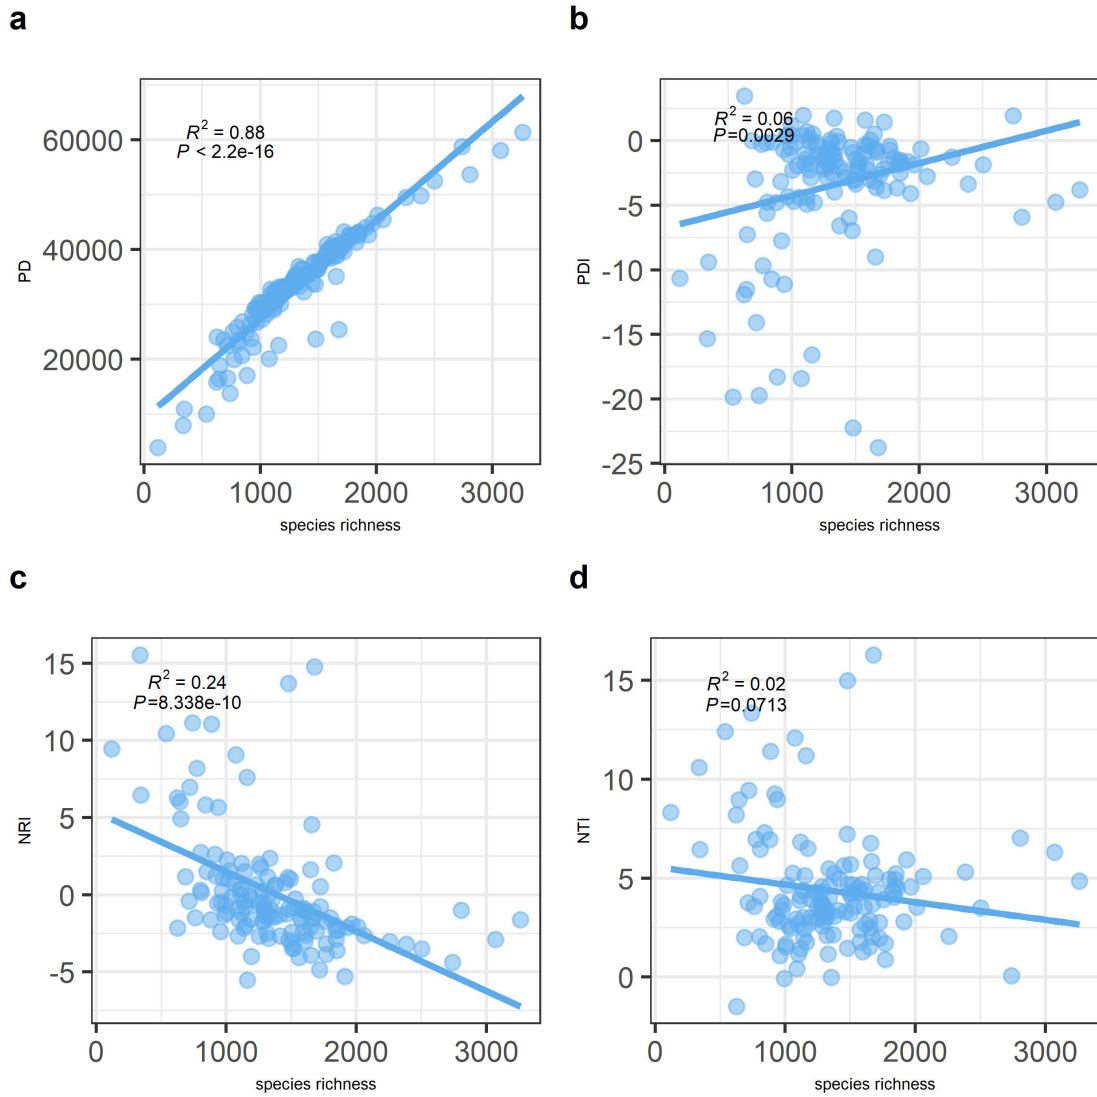

**Supplementary Fig. 3 Regression analyses between species richness and PD, PDI, NRI, NTI.** It shows a strong collinearity between species richness and PD (**a**,  $n=140$ ), and weak collinearity to phylogenetic structure PDI (**b**,  $n=140$ ), NRI (**c**,  $n=140$ ), and NTI (**d**,  $n=140$ ). PD, phylogenetic diversity; PDI, phylogenetic diversity index; NRI, net relatedness index; NTI, nearest taxon index. Relationships are denoted with solid lines and fit statistics ( $R^2$  and  $P$  values). Source data are provided as a Source Data file.



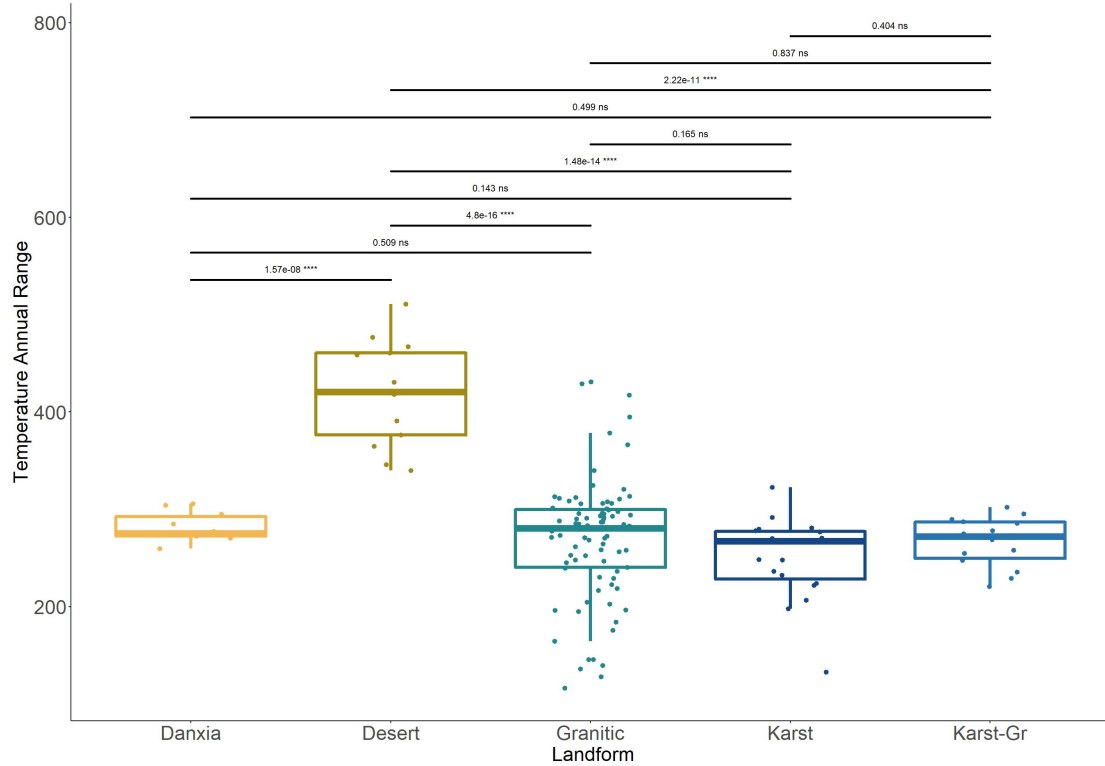

**Supplementary Fig. 4 Temperature annual range (TAR) of different landforms.** The sample sizes ( $n$ ) for Danxia, Desert, Granitic, Karst, Karst-Gr are 10, 13, 84, 19 and 14, respectively. The box plots show the first and third quartiles (box limits), median (center line), and whiskers extend to a maximum of 1.5 times the interquartile range. Differences between each pair of landforms determined by using a two-sided, independent samples t test and  $P$ -values shown above the black line. \*\*\*\* $P < .00001$ ; ns = not significant. Source data are provided as a Source Data file.

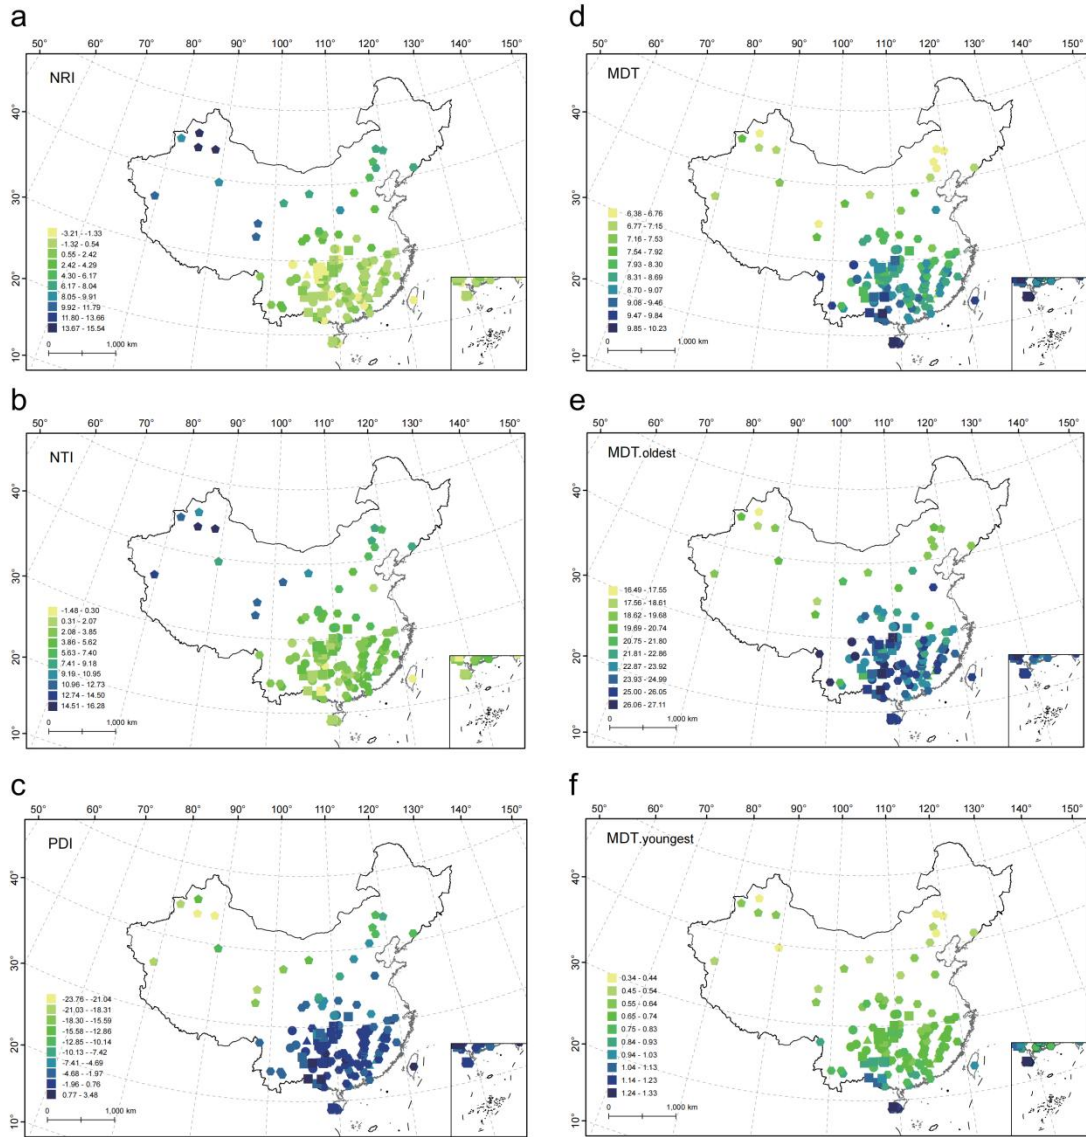

**Supplementary Fig. 5 Geographic patterns of phylogenetic structure, and MDTs of 140 mountain floras. a** NRI (net relatedness index), **b** NTI (nearest taxon index), **c** PDI (phylogenetic diversity index), **d** MDT (mean diversity time of all species), **e** MDT<sub>.oldest</sub> (mean divergence time of the oldest 25% of species), **f** MDT<sub>.youngest</sub> (mean divergence time of the youngest 25% of species). The shapes of mountain flora represents the type of landform, specifically the triangle is Danxia, square is karst, circle is karst-granitic, pentagon is desert, and hexagon is granitic. The sample sizes ( $n$ ) for Danxia, desert, granitic, karst, karst-granitic are 10, 13, 84, 19 and 14, respectively. Source data are provided as a Source Data file.

## Species accumulate along historical

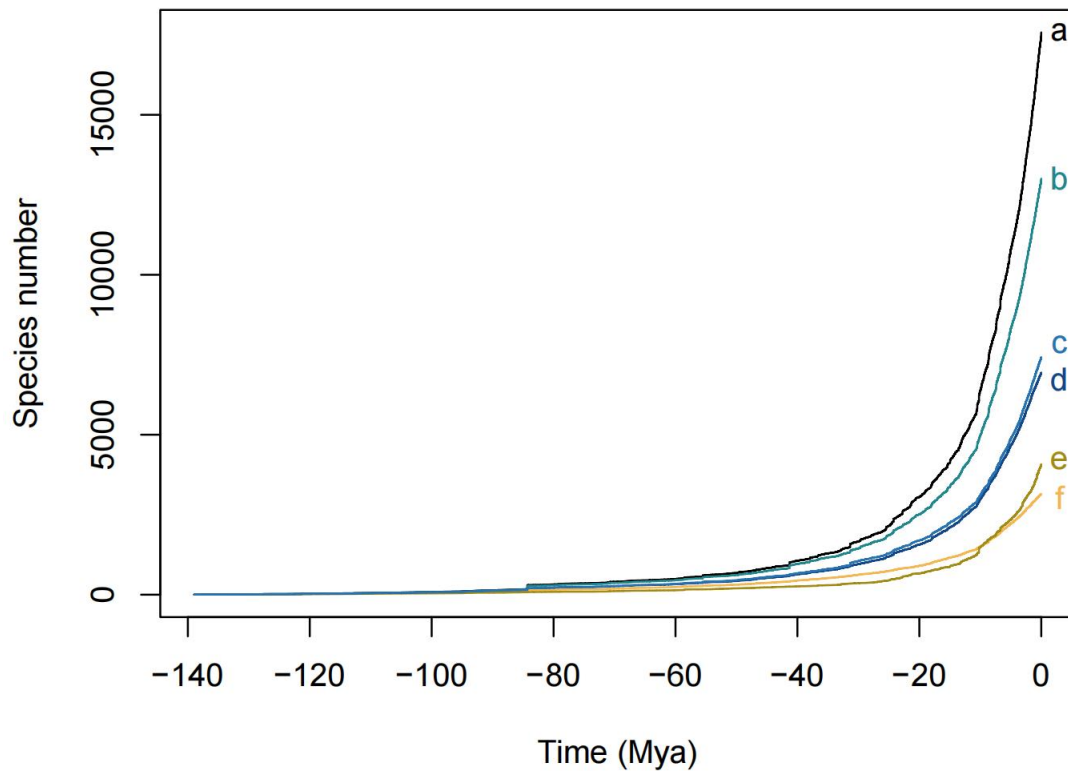

**Supplementary Fig. 6** Number of angiosperm species of different landforms during specified geological times. **a** all species ( $n=17576$ ); **b** species occurs in granitic landform ( $n=13005$ ); **c** species occurs in karst-granitic landform ( $n=7423$ ); **d** species occurs in karst landform ( $n=6941$ ); **e** species occurs in desert landform ( $n=4077$ ); **f** species occurs in Danxia landform ( $n=3146$ ). Source data of dated phylogenetic trees are available at <https://doi.org/10.5061/dryad.b2rbnzsk1>.

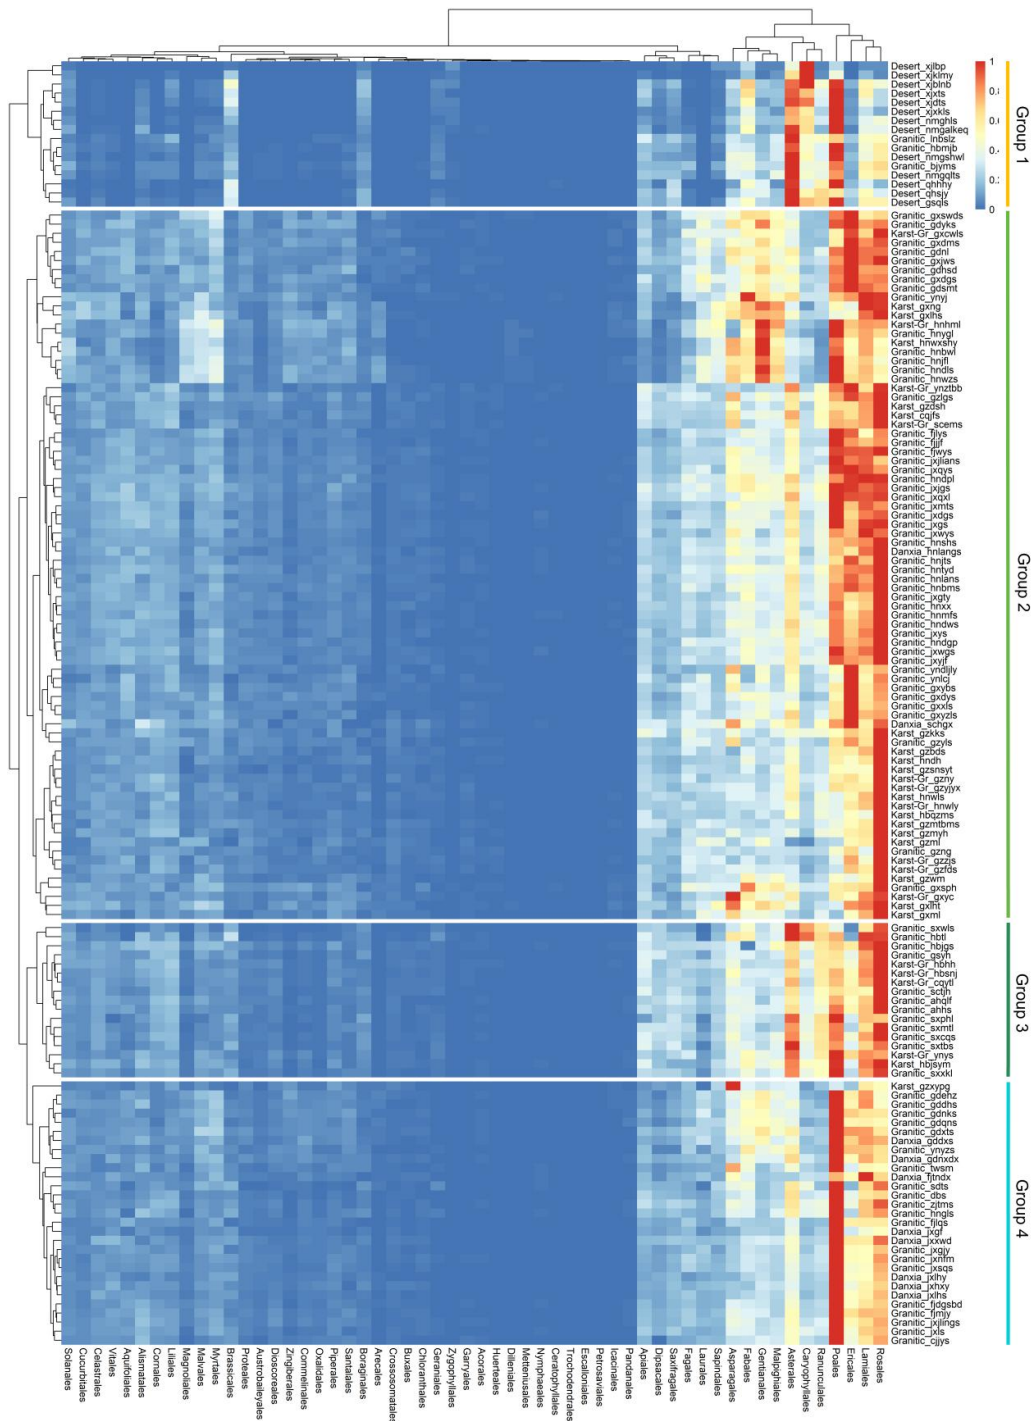

**Supplementary Fig. 7 Thermodynamic chart of composition in order level of mountain floras.** The species number of a order has been normalized to 0-1 range by  $(x)/(x_{max})$ . It is shown that the flora composition of desert landform primarily belongs to the group 1, with a dominant presence of Poales, Asterales, Caryophyllales, Fabales, Brassicales, and Boraginales. The group 2 comprises Granitic, karst, and karst-granitic floras, which are rich in Rosales, Ericales, Poales, Lamiales, Asterales. Moreover, a subclade comprising karst and karst-granitic is nested within group two, with Ericales and Lamiales being less dominant than other subclades in this group. The group 3, located in central China, consists of granitic and karst-granitic floras. Among them, the Rosales exhibits the highest level of diversity, while Lamiales, Ericales, Asterales, and Asparagales are also abundant. The group 4 formed by mainly by Granitic and Danxia floras, there flora is abundant in Poales, Rosales, Lamiales, Ericales. Furthermore, Ericales in Danxia is less dominant than granitic, but Poales in Danxia is more abundant than granitic. Source data are provided as a Source Data file.

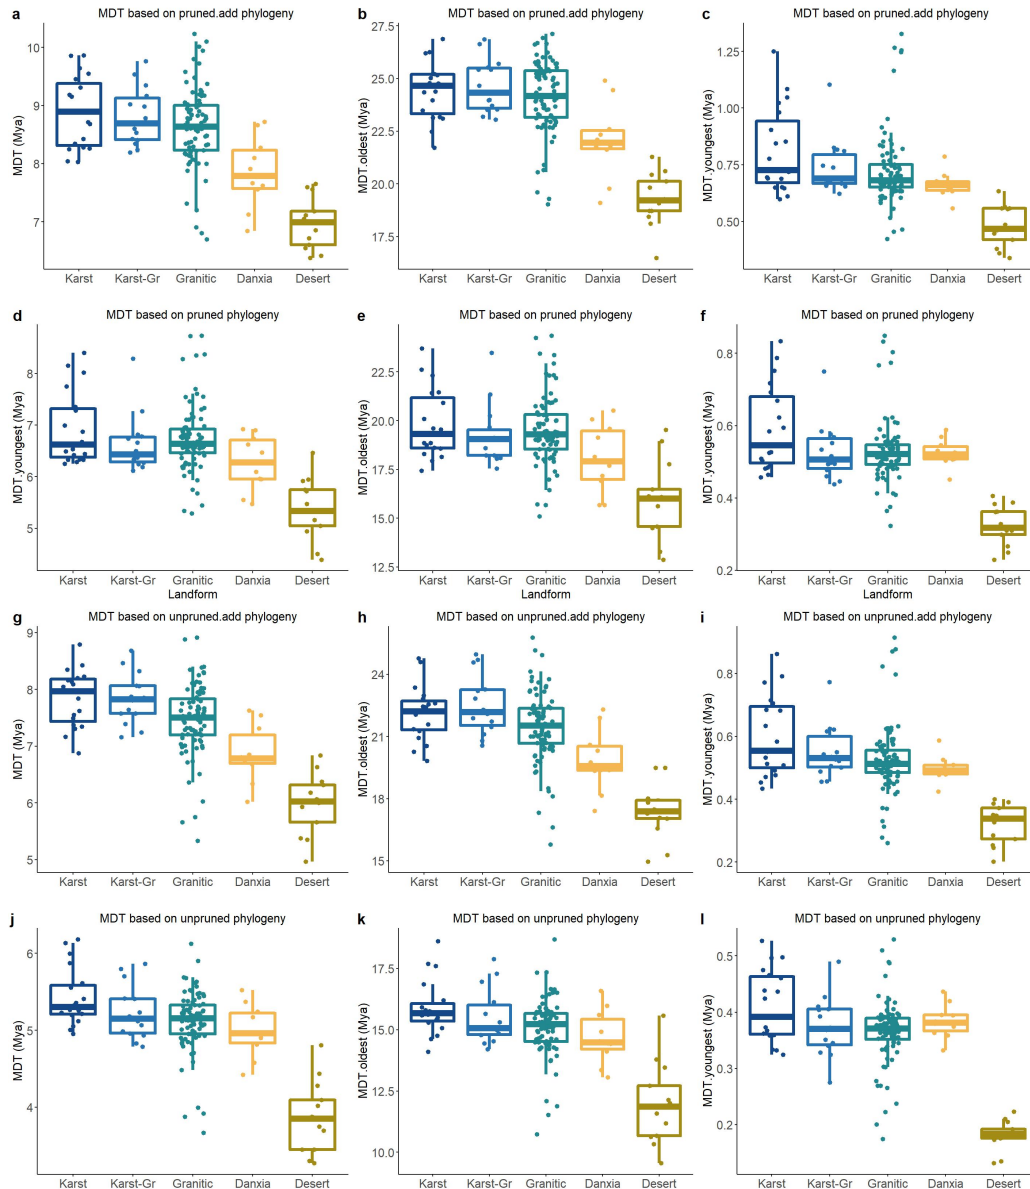

**Supplementary Fig. 8 MDT results derived from four species divergence time datasets. a-c** The species divergence time referred to a pruned.add phylogenetic tree, encompassed a total of 17,576 species. Among these, ages for 8,863 species were extracted from the pruned phylogenetic tree, while ages for an additional 8,713 species (designated as add.age) were estimated using the BLADJ method<sup>140</sup>. **d-f** The unpruned.add phylogeny included 17,576 species, of which ages of 8863 species extract from the GBOTB.extended.LCVP.tre<sup>139</sup>, and ages of others 8713 species (add.age) are added by BLADJ method<sup>140</sup>. **g-i** The pruned phylogeny included 8863 species, age extract from the pruned phylogeny tree (this study). **j-l** The unpruned phylogeny included 8863 species, age extract from the GBOTB.extended.LCVP.tre<sup>139</sup>. Definition of MDT, MDT.youngest, and MDT.oldest are as in Supplementary Fig. 5. The results shown the MDT patterns of mountain flora are similar of the four different species divergence time datasets. The MDT of karst landform is always the highest, while the MDT of Danxia landform and desert landform is lower. The results also shown that the MDT estimate from pruned phylogeny (**j-l**) is higher than the unpruned phylogeny (**g-i**), and the pruned.add phylogeny (**a-c**) is higher than the unpruned.add phylogeny (**d-f**). This could be expected, as the species branch in a pruned phylogeny is usually longer than which in the global plant phylogeny or a phylogeny included more species. In generally, the species ages inferred in this four phylogeny did not affect the MDT patterns between mountain in different landform. The sample sizes ( $n$ ) for Danxia, desert, granitic, karst, karst-granitic are 10, 13, 84, 19 and 14, respectively. Differences between each pair of landforms determined by using a two-sided, independent samples  $t$  test. Source data are provided as a Source Data file.

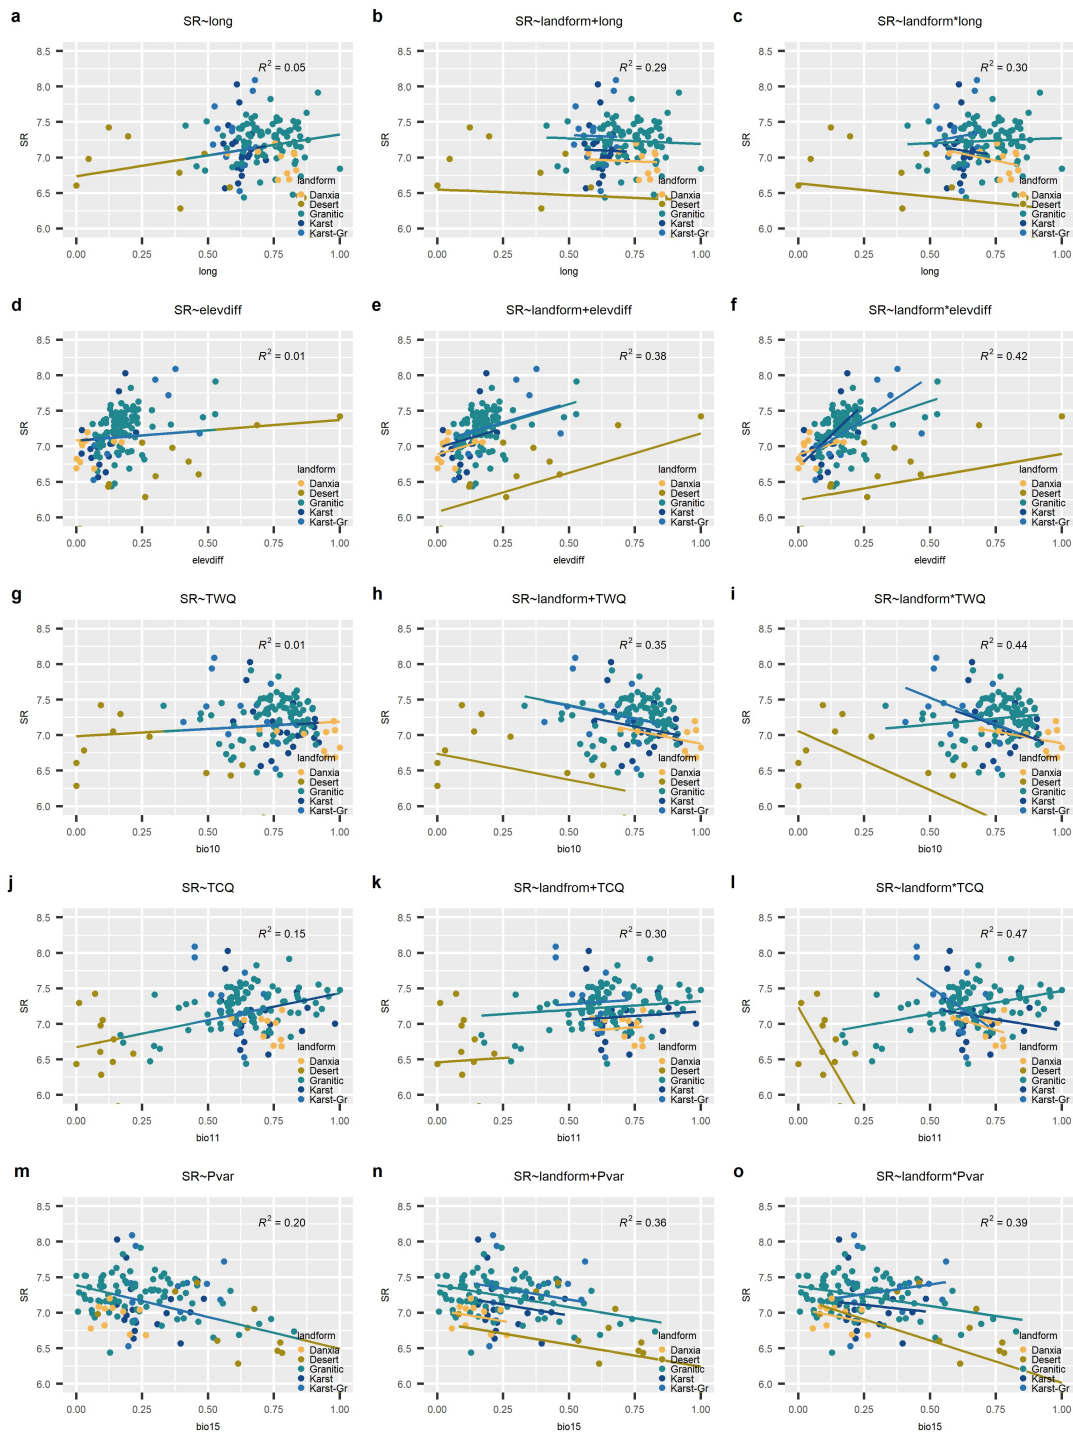

**Supplementary Fig. 9 Interaction effects between landform and environmental variables on species richness (SR).** **a-c** Interaction effects between landform and longitude on SR. **d-f** Interaction effects between landform and elevdiff (difference value between the highest elevation and lowest elevation) on SR. **g-i** Interaction effects between landform and TWQ (Mean Temperature of Warmest Quarter) on SR. **j-l** TCQ is positively correlated with SR (**j**). When consider the interactions with landform, the TCQ still positive correlation to the SR in granitic landform mountain, while negative correlation in Danxia, desert, and karst landforms (**l**). **m-o** Interaction effects between landform and Pvar (Precipitation Seasonality) on SR. Here only shown the interaction of landform with the environmental variables, which occurs in the full model. Karst-Gr, karst-granitic. SR represent the log-converted species richness, and the other variables are normalization into 0-1 by formula  $(x - x_{\min}) / (x_{\max} - x_{\min})$ . Source data are provided as a Source Data file.

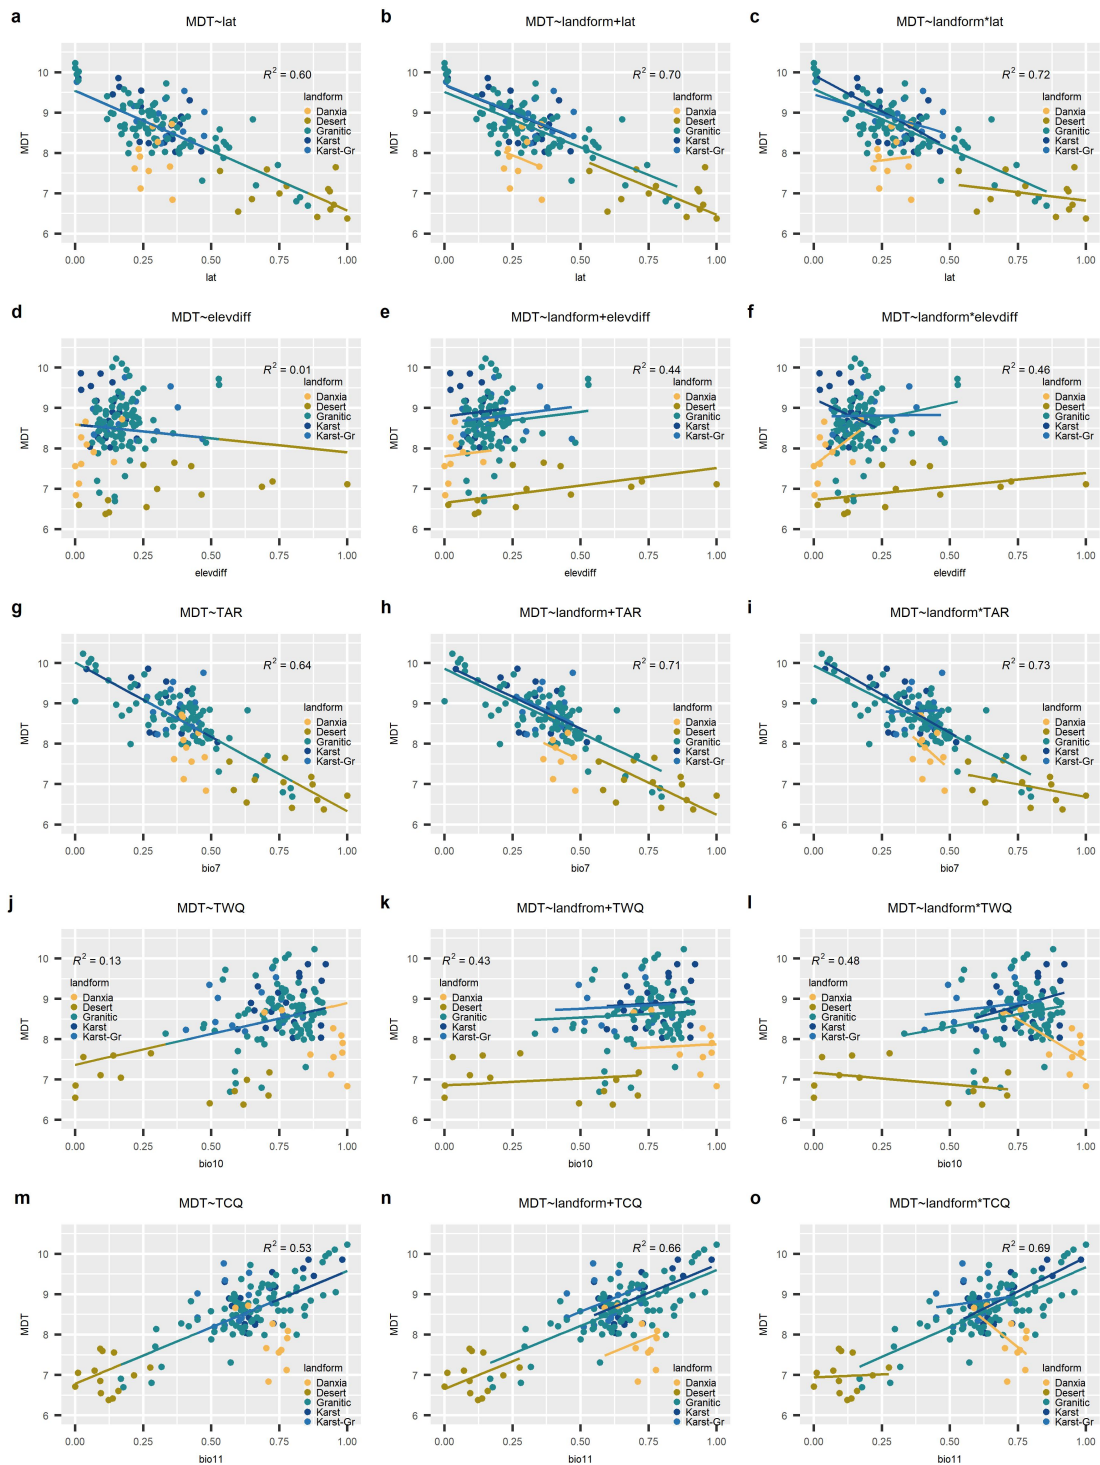

**Supplementary Fig. 10 | Interaction effects between landform and environmental variables on MDT (mean diversity time of all species in a mountain).** a-c Interaction effects between landform and lat (latitude) on MDT. d-f Interaction effects between landform and elevdiff (difference value between the highest elevation and lowest elevation) on MDT. g-i Interaction effects between landform and TAR (Temperature Annual Range) on MDT. j-l Interaction effects between landform and TWQ (Mean Temperature of Warmest Quarter) on MDT. m-o Interaction effects between landform and TCQ (Mean Temperature of Coldest Quarter) on MDT. Here only shown the interaction of landform with the environmental variables, which occurs in the full model. Karst-Gr, karst-granitic. Source data are provided as a Source Data file.

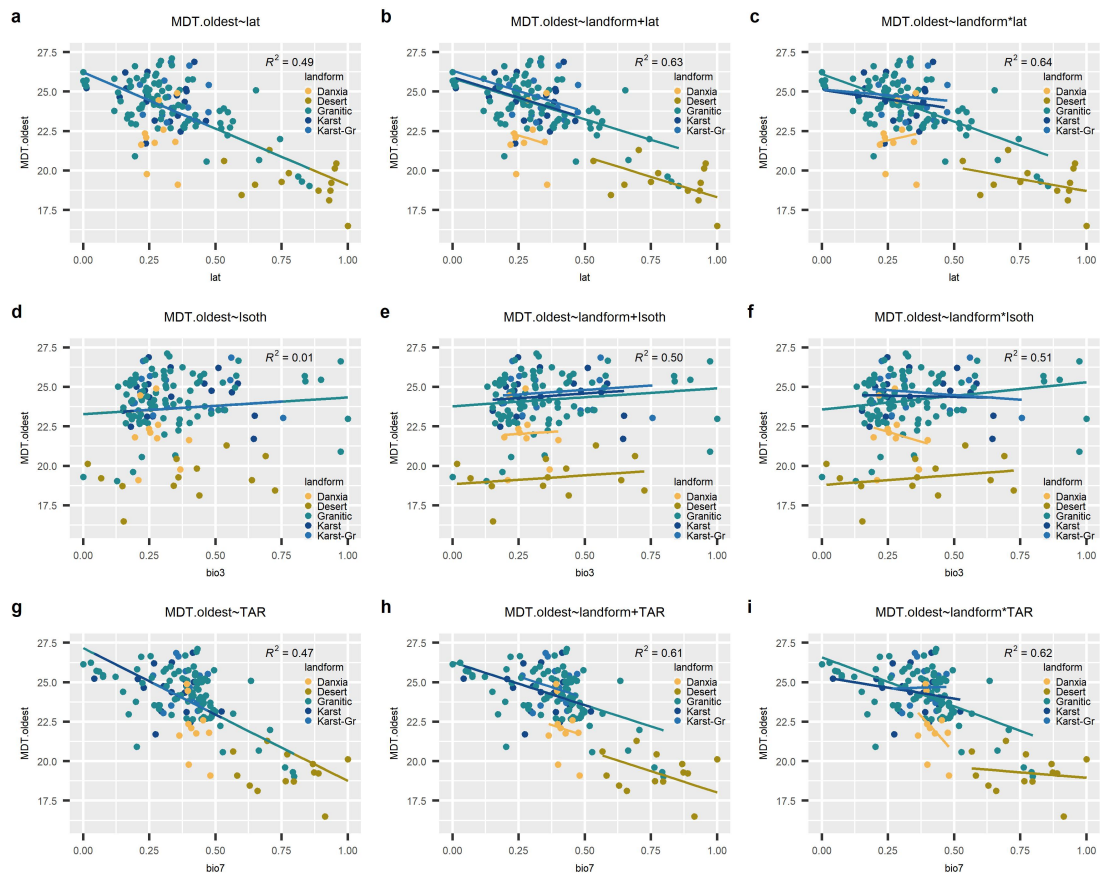

**Supplementary Fig. 11 | Interaction effects between landform and environmental variables on MDT.oldest (mean diversity time of 25% oldest species in a mountain).** a-c Interaction effects between landform and lat (latitude) on MDT.oldest. d-f Interaction effects between landform and Isoth (Isothermality) on MDT.oldest. g-i Interaction effects between landform and TAR (Temperature Annual Range) on MDT.oldest. Here only shown the interaction of landform with the environmental variables, which occurs in the full model. Karst-Gr, karst-granitic. Source data are provided as a Source Data file.



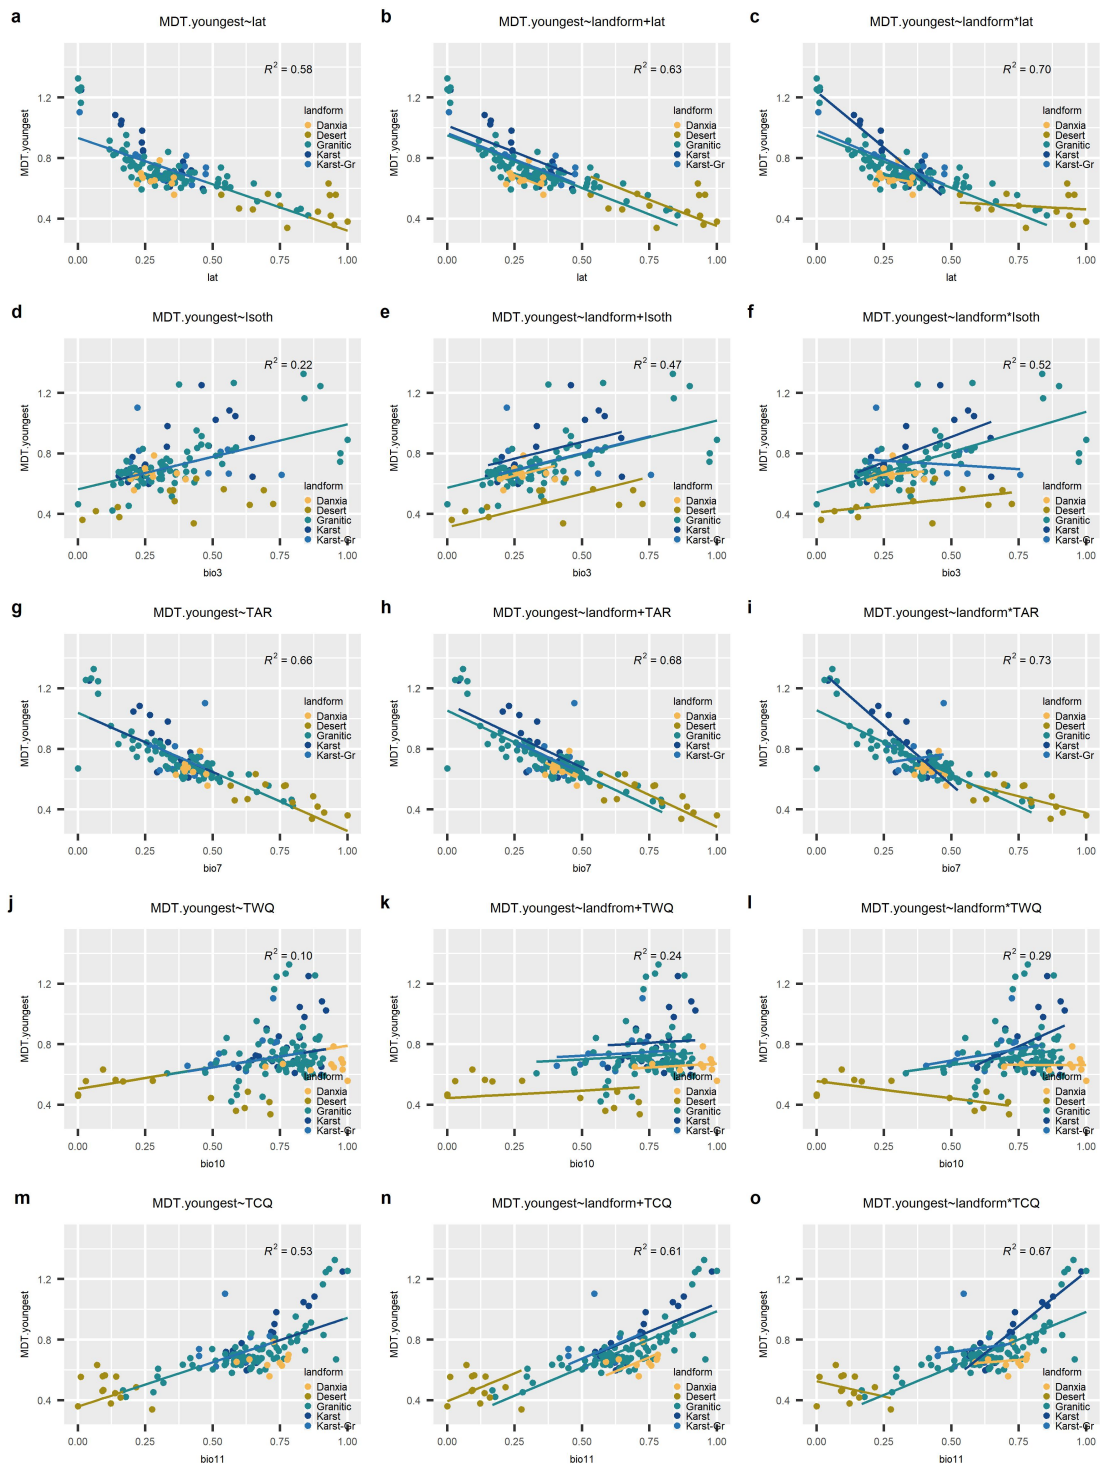

**Supplementary Fig. 12 | Interaction effects between landform and environmental variables on MDT.youngest (mean diversity time of 25% youngest species in a mountain). a-c** Interaction effects between landform and lat (latitude) on MDT.youngest. **d-f** Interaction effects between landform and Isoth (Isothermality) on MDT.youngest. **g-i** Interaction effects between landform and TAR (Temperature Annual Range) on MDT.youngest. **j-l** Interaction effects between landform and TWQ (Mean Temperature of Warmest Quarter) on MDT.youngest. **m-o** Interaction effects between landform and TCQ (Mean Temperature of Coldest Quarter) on MDT.youngest. Here only shown the interaction of landform with the environmental variables, which occurs in the full model. Karst-Gr, karst-granitic. Source data are provided as a Source Data file.

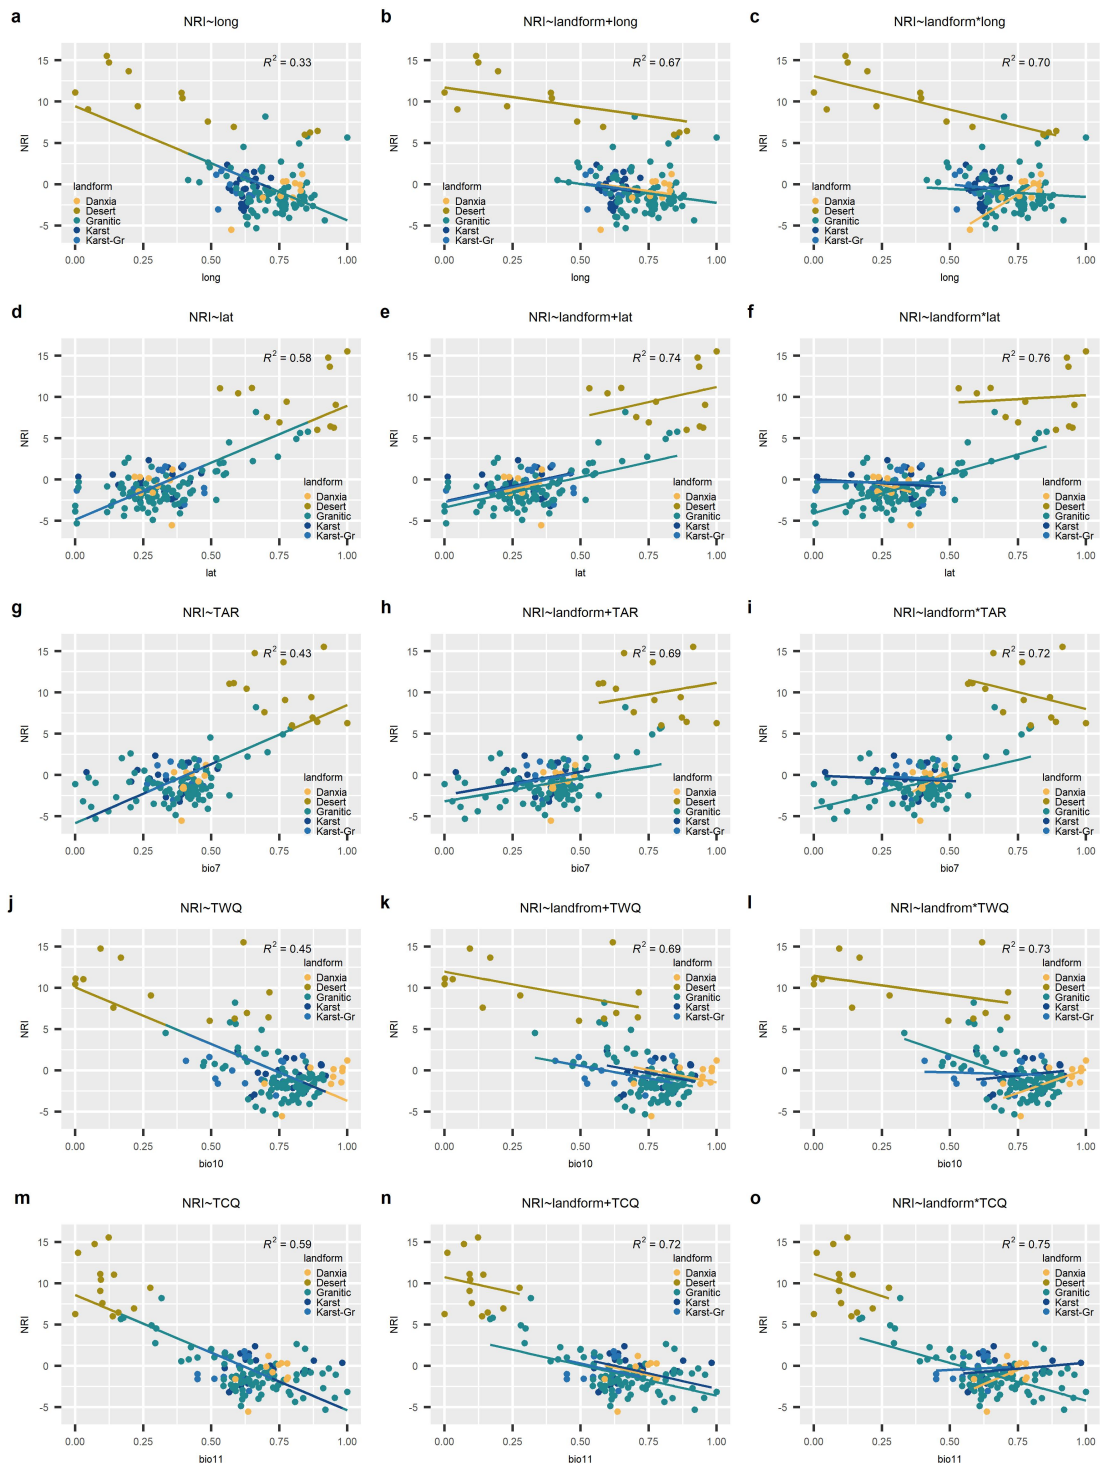

**Supplementary Fig. 13 | Interaction effects between landform and environmental variables on NRI (net relatedness index).** a-c Interaction effects between landform and long (longitude) on NRI. d-f Interaction effects between landform and lat (latitude) on NRI. g-i Interaction effects between landform and TAR (Temperature Annual Range) on NRI. j-l Interaction effects between landform and TWQ (Mean Temperature of Warmest Quarter) on NRI. m-o Interaction effects between landform and TCQ (Mean Temperature of Coldest Quarter) on NRI. Here only shown the interaction of landform with the environmental variables, which occurs in the full model. Karst-Gr, karst-granitic. Source data are provided as a Source Data file.

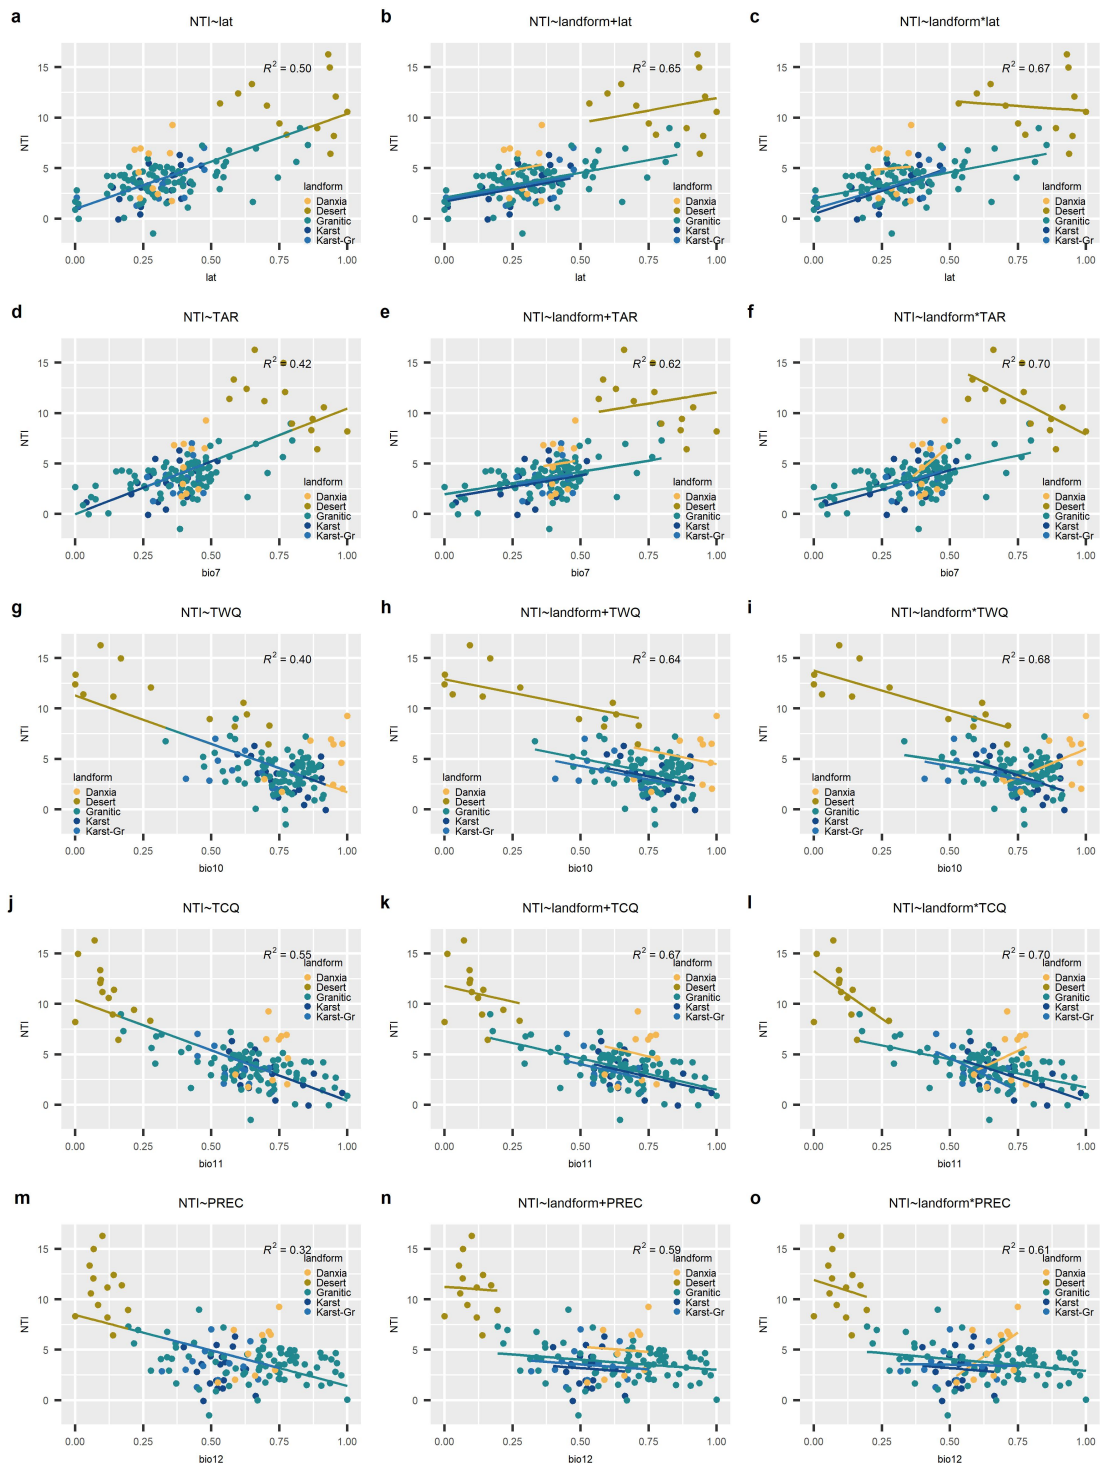

**Supplementary Fig. 14 | Interaction effects between landform and environmental variables on NTI (nearest taxon index).** a-c Interaction effects between landform and lat (latitude) on NTI. d-f Interaction effects between landform and TAR (Temperature Annual Range) on NTI. g-i Interaction effects between landform and TWQ (Mean Temperature of Warmest Quarter) on NTI. j-l Interaction effects between landform and TCQ (Mean Temperature of Coldest Quarter) on NTI. m-o Interaction effects between landform and PREC (Annual Precipitation) on NTI. Here only shown the interaction of landform with the environmental variables, which occurs in the full model. Karst-Gr, karst-granitic. Source data are provided as a Source Data file.

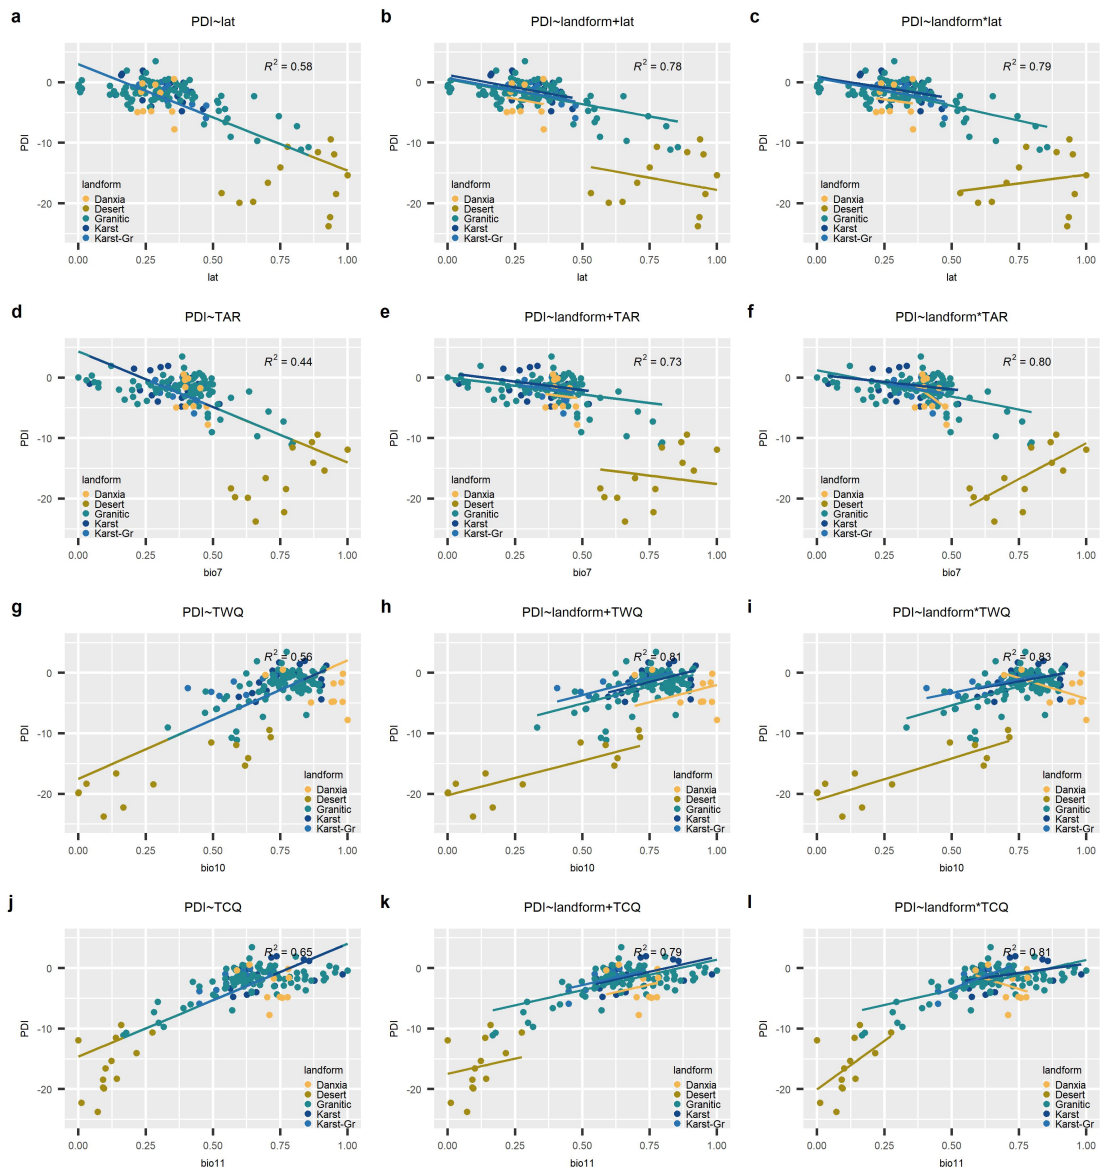

**Supplementary Fig. 15 | Interaction effects between landform and environmental variables on PDI (phylogenetic diversity index).** a-c Interaction effects between landform and lat (latitude) on PDI. d-f Interaction effects between landform and TAR (Temperature Annual Range) on PDI. g-i Interaction effects between landform and TWQ (Mean Temperature of Warmest Quarter) on PDI. j-l Interaction effects between landform and TCQ (Mean Temperature of Coldest Quarter) on PDI. Here only shown the interaction of landform with the environmental variables, which occurs in the full model. Karst-Gr, karst-granitic. Source data are provided as a Source Data file.

## Supplementary Reference

1. Xu, K.-K. *Study on flora of Danxia Landform in Jiangxi* (Gannan Normal University, master dissertation, 2016).
2. Peng, S.-L., et al. *Comprehensive Scientific Investigation of Animal and Plant Resources in Danxiashan in Guangdong* (Science Press, 2011).
3. Hu, C. *A study of plant diversity evaluation in Danxia Wutong Nature Reserve* (Central South University of Forestry and Technology, master dissertation, 2018).
4. China Danxia World Natural Heritage Professional Protection Committee. *Plant Checklist of Langshan*. (Scientific Report, 2008).
5. Li, Z.-J., Chen, X.-L. & Liu, C.-M. *The Biodiversity of Taining World Natural Heritage* (Science Press, 2012).
6. Yang, Y.-C. *Report of Comprehensive Scientific Investigation of Huagaoxi Nature Reserve* (Sichuan Natural Resources Institute, 2001).
7. He, Y.-J. *Studies on Seed Plant Biodiversity and Conservation in Main Forest Regions of San Jiangyuan Nature Reserve, Qinghai Province* (Beijing Forestry University, Phd dissertation, 2004).
8. Wu, Y.-H. & Mei, L.-J. *Plant Resources and Environment of the Yellow River Source Area* (Qinghai Peoples Publishing House, 2001).
9. Zhang, L.-J. *Study on the Flora and Species Diversity of Plants in the West Kunlun Mountain in Xinjiang* (Shihezi University, master dissertation, 2018).
10. Liu, J.-Q., Yang, Q.-S. & Wang, Y.-K. *Comprehensive Investigation Report of Qilianshan National Nature Reserve in Gansu Province* (Gansu Science & Technology Press, 2008).
11. Liu, Z.-S. *Comprehensive Scientific Investigation Report of the Helanshan National Nature Reserve in Inner Mongolia* (Ningxia People's Publishing House, 2015).
12. Yuan, G.-Y., Zhang, Y. & Yuan, L. *Lopnur Nature Reserve* (Science Press, 2012).
13. Zhao, Y.-Y. *Study on the Flora of Seed Plants in the Qilaotu Mountain of Northern Yanshan Mountain* (Inner Mongolia Agricultural University, master dissertation, 2016).
14. Xiong, J.-W. *Comprehensive Scientific Investigation of the Western Tianshan Mountains in Xinjiang* (China Forestry Publishing House, 2017).
15. Xiong, J.-W. *Comprehensive Scientific Investigation of the Eastern Tianshan Mountain in Xinjiang* (China Forestry Publishing House, 2015).
16. Soyolt. *Study on Plants Diversity and Ethnobotany in Arhorchin National Nature Reserve* (Inner Mongolia Agricultural University, Phd dissertation, 2013).
17. Chen, T., Cui, D.-F. & Liao, W.-B. *Scientific Investigation of Mountain Forest Resources of Southern Bortala Mengol Autonomous Prefecture in Xinjiang* (China Forestry Publishing House, 2021).
18. Zhang, S.-L. *Study on Plants Diversity and Conservation in Saihanwula Nature Reserve Inner Mongolia* (Beijing Forestry University, Phd dissertation, 2007).
19. Lu, G.-H., et al. *Xinjiang Kelamayi Shengwu Duoyangxing Ji Baohu* (Xinjiang People's Publishing House, 2008).
20. Xu, Z. *Flora and Phytogeography of Mt. Houmiling Nature Reserve, Hainan, China* (South China Agricultural University, master dissertation, 2017).
21. Tan, W.-F. *Study on Biodiversity Conservation in Guangxi Cenwanglaoshan Nature Reserve* (China Environment Science Press, 2005).
22. Li, S.-W. *Study on Species Diversity of Vascular Plants in Yachang Orchid National Nature Reserve of Guangxi* (Guangxi Normal University, master dissertation, 2017).
23. Deng, L.-X., et al. *Scientific Survey and Research on Nayong Nature for Dove Tree in Guizhou province* (China Forestry Publishing House, 2013).

24. Xie, S.-X., Li, M.-J. & Yu, L.-F. *Scientific Survey of the Zhujiangshan Nature Reserve in Guizhou* (China Forestry Publishing House, 2000).
25. Peng, M.-C., Wang, C.-Y. & Dang, C.-L. *Biodiversity and Conservation in Yaoshan Nature Reserve, Yunnan* (Science Press, 2006).
26. Yu, L.-F., Li, M.-J. & Xie, S.-X. *Scientific Survey of the Fodingshan Nature Reserve in Guizhou* (China Forestry Publishing House, 2000).
27. Ding, L. *A Study on Floristic Phytogeography of Seed Plants in North of Chaotong Nature Reserve, Yunnan, China* (Southwest Forestry College, master dissertation, 2007).
28. Zhu, J., et al. *Comprehensive Scientific Survey and Research on Yangxi Nature Reserve in Yinjiang County of Guizhou Province* (China Forestry Publishing House, 2017).
29. Zhou, H. *The Research of Plant Diversity in Wulingyuan World Natural Heritage Site* (Central South University of Forestry and Technology, master dissertation, 2016).
30. Li, Z.-Y. & Shi, L. *Plants of Mount Emei* (Beijing Science and Technology Press, 2007).
31. Song, C.-S. & Liu, S.-X. *Scientific Survey of the Hubei Houhe Nature Reserve* (China Forestry Publishing House, 1999).
32. Gao, X.-M., Xu, W.-T. & Xie, Z.-Q. *Plant Checklist of Shennongjia* (Science Press, 2019).
33. Bi, R.-C., Wei, X.-Z., Duan, Z.-S., Wei, W.-L. & Cui, B.-Y. *Scientific Investigation Report of the Wulushan Nature Reserve in Shanxi* (China Science and Technology Press, 2004).
34. Huang, K.-Y. *Studies on the Spermatophytic Diversity of Diaoluoshan Nature Reserve in Hainan Island* (SunYat-Sen University, master dissertation, 2004).
35. Hainan Forestry Department, Hainan Jianfengling Nature Reserve Management Station, Nature Reserve Research Center of Beijing Forestry University. *Comprehensive Investigation Report of Jianfengling Nature Reserve in Hainan*. (Scientific Report, 2001).
36. Fan, Q. *Studies on the Flora of Wuzhishan Area in Hainan Island* (SunYat-sen University, master dissertation, 2004).
37. Zhang, R.-J., et al. *Spermatophyte Flora of Yinggeling Mountain, Hainan*. *Biodiversity Science*, 15(4): 382-392 (2007).
38. Plant Laboratory of Sun Yat-Sen University. *Plant Checklist of Bawangling National Reserve in Hainan*. (Scientific Report, 2004).
39. Tan, W.-F. *Biodiversity and Conservation System of Guangxi Shiwandashan Nature Reserve* (China Environment Science Press, 2005).
40. Zhao, N.-X., et al. *Integrated Study on Biodiversity of E'huangzhang Natural Reserve, Guangdong* (South China Botanical Garden, 2007).
41. Gao, Y.-D. *Floristic and Resources Study on the Seed Plants in Yunkaishan Nature Reserve* (Inner Mongolia Agricultural University, master dissertation, 2010).
42. Huang, Z.-L. *Comprehensive Investigation Report of Dinghushan National Nature Reserve in Guangdong Province* (Guangdong Science and Technology Press, 2015).
43. Wu, W.-Z., Chen, J.-H. & Wu, C.-C. *Scientific Survey of Guangdong Xiangtoushan Nature Reserve* (China Forestry Publishing House, 2003).
44. Plant laboratory of Sun Yat-sen University. *Plant Checklist of Heishiding Nature Reserve* (Sun Yat-Sen University, 1987).
45. Wu, L. *Studies on Species Diversity of Plants in Damingshan National Nature Reserve of Guangxi* (Guangxi Normal University, master dissertation, 2012).
46. Liao, W.-B. & Boufford, D. E. *A Checklist of the Vascular Plants of Taiwan* (Sun Yat-Sen University, manuscript and data, 2010).
47. Li, H.-T. *A study on Floristic Phytogeography of Seed Plants in Yuanjiang Nature Reserve, Yunnan* (Southwest Forestry College, master dissertation, 2008).
48. Chen, H.-F., Cui, X.-D. & Zhang, Y.-Y. *Plants of Nankunshan* (China Forestry Publishing

- House, 2017).
49. Wang, J., Du, F., Yang, Y.-M., Tian, K. & Wang, Y.-X. *Scientific Survey and Research on Lancang River Nature Reserve in Yunnan Province, China* (Science Press, 2010).
  50. Jiang, L.-Q. *The Preliminary Study on the Flora of Seed Plants in Yizu Mountain and their Use* (Yunnan University, master dissertation, 2018).
  51. Xu, Y.-M. *Studies on Flora of Vascular Plant of Daguishan in Guangxi* (Guangxi Normal University, master dissertation, 2012).
  52. Tan, W.-F. & Luo, B.-T. *Research and Conservation of Biodiversity in Guangxi Dayaoshan Natural Reserve* (China Environment Science Press, 2010).
  53. Zhang, J.-Q. *Comprehensive Scientific Investigation of Shimentai National Nature Reserve in Guangdong Province* (Huazhong University of Science and Technology Press, 2017).
  54. Liu, X.-Z., Xiao, Z.-Y. & Ma, J.-H. *Scientific Survey and Study on the Forest Ecosystem in Jiangxi Jiulianshan Nature Reserve* (China Forestry Publishing House, 2002).
  55. Guangxi Institute of Botany. *Vascular Plants List of Xiling Mountain Nature Reserve*. (Guangxi Institute of Botany, 2015).
  56. Xing, F.-W., Chen, H.-F., Wang, F.-G., Chen, Z.-M. & Zeng, Q.-W. *Catalogue of Plant Species Diversity in Nanling Mountains* (Huazhong University of Science and Technology Press, 2011).
  57. Xiang, J.-F. *Study on the Flora of Seed Plants in Hunan Lanshan Forest Park* (Central South University of Forestry and Technology, master dissertation, 2009).
  58. Ning, S.-J., Su, Y. & Tan, X.-F. *Critical Biodiversity Areas: Scientific Survey of the Jiuwanshan Nature Reserve in Guangxi* (Science Press, 2010).
  59. Lin, P. *Comprehensive Scientific Investigation Report of the Liangyeshan Nature Reserve in Fujian* (Xiamen University Press, 2001).
  60. Wei, S.-S. *Study on Flora of Vascular Plants and Resource Protection Sanpihu Nature Reserve of Guangxi* (Guangxi University, master dissertation, 2017).
  61. Ning, S.-J., Li, F. & He, C.-X. *Critical Biodiversity Areas: Scientific investigation on Yuanbao Mountain in Guangxi* (Guangxi Science and Technology Publishing House, 2009).
  62. Yang, D.-D., Wu, Y.-M. & Yu, X.-L. *Biodiversity Research and Conservation of the Dupangling National Nature Reserve in Hunan* (Hunan Science and Technology Press, 2013).
  63. Qiu, R.-W. *Study on the Flora of Seed Plants of Daguping Forestland in Shuangpai County, Hunan Province* (Central South University of Forestry and Technology, master dissertation, 2008).
  64. Liu, X.-M., Guo, Y.-R. & Liu, R.-L. *The Collection of Scientific Exploration of Jiangxi Qiyunshan Nature Reserve* (China Forestry Publishing House, 2010).
  65. Yi, R.-Y. *Study on the Flora of Seed Plants in the Bamian Mountain of Hunan Province* (Hunan Normal University, master dissertation, 2015).
  66. Luo, Y. et al. *Scientific Investigation and Study of Yueliangshan Nature Reserve in Guizhou province* (China Forestry Publishing House, 2019).
  67. Liu, R.-L., et al. *Comprehensive Scientific Survey of Ganjiangyuan National Nature Reserve in Jiangxi province* (China Forestry Publishing House, 2013).
  68. Deng, X.-J., Jiang, Z.-G., Yang, Q.-L. & Li, X.-Y. *Comprehensive Scientific Investigation Report of the Jintongshan Nature Reserve in Hunan* (Hunan Normal University Press, 2011).
  69. Guangxi Forestry Exploration and Design Institute. *Comprehensive Scientific Investigation Report of the Yinzhulaoshan Nature Reserve in Guangxi* (Scientific Report, 2013).
  70. Wildlife Conservation Institute of Jiangxi Academy of Forestry & Jiangxi Suichuan Forestry Bureau. *Investigation Report of Nanfengmian Nature Reserve in Jiangxi* (Scientific Report, 2008).

71. Lin, P., Li, Z.-J. & Zhang, J. *Comprehensive Scientific Investigation Report of the Junzifeng Nature Reserve in Fujian* (Xiamen University Press, 2005).
72. Zhang, H.-H. & Zhang, X. *Biodiversity Study of Leigongshan National Nature Reserve* (Guizhou Science and Technology Publishing House, 2007).
73. Li, X. *Study on the Flora of Seed Plants in Dong'an Shunhuang Mountain National Nature Reserve of Hunan* (Central South University of Forestry and Technology, master dissertation, 2020).
74. Liao, W.-B., et al. *Study on Biodiversity of the Taoyuandong National Nature Reserve in Hunan Province* (Science Press, 2018).
75. Zhang, H.-H. *Scientific investigation Report of Nangong Nature Reserve* (Guizhou Science and Technology Publishing House, 2003).
76. Liao, W.-B., et al. *Integrated Study on Biodiversity of Mount Jinggangshan Regions In China* (Science Press, 2014).
77. He, L.-Z. & Liu, R.-L. *Scientific Survey and Biodiversity Study of the Qixiling Nature Reserve in Jiangxi Province* (Jiangxi Science and Technology Press, 2010).
78. Lin, P., Xie, D.-L. & Li, Z.-J. *Comprehensive Scientific Investigation Report of the Minjiangyuan Nature Reserve in Fujian* (Xiamen University Press, 2004).
79. Fujian Forestry Department. *Comprehensive Scientific Investigation Report of the Longxishan Nature Reserve* (Scientific Report, 1997).
80. Liu, B.-B. *The Floristic Geography of Spermatophyta in the North Section of Mt. Donggong* (Zhejiang A&F University, master dissertation, 2013).
81. Liu, X.-Z. & Fang, F.-S. *Comprehensive Scientific Investigation Report of the Gaotianyan Nature Reserve in Jiangxi*. (Scientific Report, 2007).
82. Chen G.-X., Zhang, D.-G. & Xiao, J.-W. *Inventory of Species Diversity of Vascular Plants in Wugongshan Areas* (Xin-an Jiaotong University Press, 2019).
83. Wang, B., Li, H.-J., Guo, Q.-S. & Xia, L.-F. *Research on Forest Biodiversity in Dagangshan Nature Reserve in Jiangxi* (China Forestry Publishing House, 2005).
84. Li, H. *Flora of Dulongjiang Region* (Yunnan Science and Technology Press, 1992).
85. Fujian Science and Technology Commission. *Scientific Investigation Report of the Wuyishan Nature Reserve* (Fujian Science and Technology Publishing House, 1993).
86. Liu, X.-Z. & Fu, Q. *Scientific Survey and Study of Rare Phytocoenosis on the Matoushan Nature Reserve in Jiangxi Province* (China Forestry Publishing House, 2006).
87. Guo, Y.-R., Jiang, B., Wang, Y.-Y., Yue, X.-G. & Ge, G. *Report of Scientific Survey on Mount Yangjifeng Reserve of Jiangxi* (Science Press, 2010).
88. Liu, X.-Z. & Fang, F.-S. *Scientific Survey of the Wuyishan Nature Reserve in Jiangxi* (China Forestry Publishing House, 2001).
89. Central South University of Forestry and Technology & Hunan Normal University. *Comprehensive scientific study of the Dawenshan Nature Reserve in Hunan* (Scientific Report, 2010).
90. Liu, X.-Z. & Wu, H.-P. *Scientific Survey and Study on the Guanshan Nature Reserve in Jiangxi Province* (China Forestry Publishing House, 2005).
91. Hunan Forestry Survey Planning and Design Institute. *Comprehensive Scientific Investigation Report on Natural Resource of the Xiaoxi Nature Reserve in Hunan* (Scientific Report, 2000).
92. Peng, S.-L., et al. *Study on Biodiversity of Mount Sanqingshan in China* (Science Press, 2008).
93. Li, J.-X. *The Floristic Analysis of Seed Plants of Pingjiang Mufu Mountain in Hunan province* (Central South Forestry University, master dissertation, 2005).
94. Li, Z.-J., Wu, X.-P., Chen, X.-L. & Liu, C.-M. *Report of Scientific Survey on Jiulingshan*



- Reserve of Jiangxi* (Science Press, 2009).
95. Wildlife Conservation Institute of Jiangxi Forestry Science Academy & Jiangxi Wuning Forestry Bureau. *Comprehensive Scientific Investigation Report of Yishan Nature Reserve in Jiangxi* (Scientific Report, 2009).
  96. Wang, Q.-F. & Ge, J.-W. *Investigation and Conservation of Biodiversity of Jiugongshan Mountain Nature Reserve* (China Forestry Publishing House, 2002).
  97. Liu, X.-Z. & Wang, L. *Scientific Survey and Study on Biodiversity on the Lushan Nature Reserve in Jiangxi province* (Science Press, 2010).
  98. Deng, H.-P. *Plant Diversity of Jinyunshan National Nature Reserve in Chongqing* (Science Press, 2017).
  99. Hu, Y.-M. & Gu, C.-M. *Research on the Biodiversity of Anhui Qingliangfeng National Nature Reserve* (Anhui Normal University Press, 2016).
  100. Hu, J.-Q. & Liang, S.-W. *Plants of Huangshan Mountain* (Fudan University Press, 1996).
  101. Ding, B.-Y., Li, G.-Y., Fu, C.-X. & Yang, S.-Z. *Flora of Tianmushan Mountain* (vol. 1-4) (Zhejiang University Press, 2010).
  102. Zi, X.-Z. & Zhang, D.-C. *Flora of Dabieshan Mountain* (China Forestry Publishing House, 2006).
  103. Deng, H.-P. *Biodiversity of Yintiaoling National Nature Reserve in Chongqing* (Science Press, 2018).
  104. Zhang, Z.-J. *Research on Biodiversity in Tangjiahe National Nature Reserve, China* (Science Press, 2016).
  105. Han, T. & Zheng, G.-H. *Scientific Investigation Report of Gaolieshan Nature Reserve in Tongbai, Henan Province* (Yellow River Water Conservancy Press, 2012).
  106. Guo, W.-Y., Dang, K.-L. & Zhao, Y.-B. *Comprehensive Scientific Investigation and Study of Motianling Nature Reserve in Shaanxi Province* (Shaanxi Science and Technology Press, 2007).
  107. Bai, Y.-X., Liu, J.-J. & Ma, X.-Q. *A Report of the Comprehensive Survey on Yuhe Nature Reserve in Gansu, China* (Gansu Science & Technology Press, 2012).
  108. Yang, X.-Z., Liu, H. & Xu, T.-Q. *Biodiversity, Conservation and Management of Xinkailing Nature Reserve* (Shaanxi Science and Technology Press, 2012).
  109. Li, Z.-G., Kang, K.-G. & Wu, Z.-H. *Comprehensive Scientific Investigation and Biodiversity Research in Pinglianghe Provincial Nature Reserve, Shaanxi Province* (Shaanxi Science and Technology Press, 2008).
  110. Li, Z.-G., Ren, Y. & Wang, X.-J. *Comprehensive Investigation report of Changqing National Nature Reserve, Shaanxi province* (Shaanxi Science and Technology Press, 2016).
  111. Ren, Y., Liu, M.-S., Tian, L.-H., Tian, X.-H. & Li, Z.-J. *Biodiversity, Conservation and Management of Taibaishan Nature Reserve* (China Forestry Publishing House, 2006).
  112. Wang, X.-H. & Li, C.-R. *Biodiversity of Mount Taishan* (Intellectual Property Publishing House, 2013).
  113. Zhao, J.-C., Wu, Y.-F. & Guan, W.-L. *Scientific Survey and Study on Biodiversity in Hebei Tuoliang Nature Reserve, China* (Science Press, 2008).
  114. Liu, G.-Q., Wang, Z.-C. & Ma, G.-Q. *Beijing Yunmengshan Nature Reserve biodiversity* (Beijing Publishing House, 2006).
  115. Chen, W., Qu, Z.-C. & Zhang, Y. *Biodiversity of Baishilizi National Nature Reserve in Liaoning province* (Liaoning Science and Technology Publishing House, 2017).
  116. Wu, Y.-F., Zhao, J.-C. & Cheng, J. *Scientific Survey and Study on Biodiversity in Hebei Maojingba Nature Reserve, China* (Science Press, 2006).
  117. Ding, T. *Studies on the Spermatophytes Flora of Wangxia Limestone Area in Hainan Island*

- (Sun Yat-sen University, master dissertation, 2002).
118. Wu, W.-H. *Studies on flora and phytogeography of Longgang National Nature Reserve of Guangxi, China* (Guangxi Normal University, master dissertation, 2011).
  119. Yang, J.-C. *Study on Species Diversity of Plants in Longhushan Nature Reserve of Guangxi* (Guangxi University, master dissertation, 2013).
  120. Tang, H. *Studies on the Flora of Vascular Plants of Laohutiao Nature Reserve of Guangxi* (Guangxi Normal University, master dissertation, 2010).
  121. Zhang, H.-H., Long, Q.-D. & Liao, D.-P. *Comprehensive Scientific Investigation of Xingyi Pogang Nature Reserve* (Guizhou Science and Technology Publishing House, 2005).
  122. Peng, R.-C. *Studies on Vascular Plants of Mulun National Natural Reserve, Guangxi, China* (Guangxi Normal University, master dissertation, 2013).
  123. Luo, Y., et al. *Scientific Survey of the Wangmo Cycad Nature Reserve in Guizhou* (Guizhou Science and Technology Publishing House, 2010).
  124. Scientific Research Department, Guizhou Maolan National Nature Reserve Administration. *Wild Animals and Plants Chenglist of the Maolan National Nature Reserve in Guizhou* (Scientific Report, 2014).
  125. Zhu, J., et al. *Scientific Survey of Bada Mountain Nature Reserve in Panxian Country of Guizhou Province* (China Forestry Publishing House, 2013).
  126. Zhang, H.-H., Zhou, Q. & Zhang, J.-G. *Comprehensive Scientific Survey of the Kuankuoshui Nature Reserve in Meitan* (Guizhou Science and Technology Publishing House, 2006).
  127. Zhu, J., et al. *Scientific Survey of Siyetun Nature Reserve in Sinan County of Guizhou Province* (China Forestry Publishing House, 2017).
  128. Yu, L.-F. *Scientific Survey of Kuankuoshui Nature Reserve* (Guizhou Science and Technology Publishing House, 2004).
  129. Xiang, X.-M. *Flora of Seeds Plants in Dehang Geopark of Hunan Province* (Jishou University, master dissertation, 2021).
  130. Gou, G.-Q., et al. *Biodiversity of Mayanghe National Nature Reserve in Guizhou* (Guizhou Science and Technology Publishing House, 2017).
  131. Deng, H.-P. *Biodiversity of Jinfoshan National Nature Reserve in Chongqing* (Science Press, 2019).
  132. Guizhou Forestry Department. *Background resources of Biodiversity in Dashahe Nature Reserve* (Guizhou Science and Technology Publishing House, 2006).
  133. Xiao, Y. *Studies on Diversity of the Seed Plants in Wulongshan National Geopark* (Jishou University, master dissertation, 2015).
  134. Liu, S.-X., Di, J.-P., Jiang, Y.-F., Gao, E.-H. & Lei, Y. *Hubei Qizimeishan Nature Reserve Scientific Survey and Research Report* (Hubei Science and Technology Press, 2006).
  135. Ma, X.-Y. *A Floristic Study of the Vascular Plants on Jingshan Mountain Extension in Jingmen City, Hubei Province* (Wuhan Botanical Garden, the Chinese Academy of Sciences, master dissertation, 2006).
  136. Xing, F.-W., et al. *Plant Resources and Protection of Shenzhen Qiniangshan Country Park* (China Forestry Publishing House, 2004).
  137. Liu, H.-J., et al. *Comprehensive Scientific Survey of Biodiversity in Shenzhen Dapeng Peninsula Nature Reserve* (Sun Yat-Sen University Press, 2016).
  138. Smith, S. A. & Brown, J. W. Constructing a broadly inclusive seed plant phylogeny. *Am. J. Bot.* 105, 302 - 314 (2018).
  139. Jin, Y. & Qian, H. VPhyloMaker2: An updated and enlarged R package that can generate very large phylogenies for vascular plants. *Plant Diversity* 44, 335 - 339 (2022).
  140. Webb, C., Ackerly, D. & Kembel, S., Phylocom: Software for the Analysis of Phylogenetic

Community Structure and Character Evolution, with Phylomatic. version 4.2  
<https://phylodiversity.net/phylocom/> (2011).
